# Supplementary material for: Oxygen spillover engineering design in atomically dispersed sites for high-efficiency photoproduction of hydrogen peroxide from water
Source: Royal Society of Chemistry journal article supplement (doi:10.1039/d5ee06121k), 2025-12-26
Supplement: d5ee06121k1.pdf [file d5ee06121k1.pdf]

# Electronic Supplementary Information

## Oxygen spillover engineering design in atomically dispersed sites for high-efficiency photoproduction of hydrogen peroxide from water

Xueming Dang,<sup>†a</sup> Shuai Wu,<sup>†b</sup> Qian Li,<sup>†c</sup> Xiaorong Gan,<sup>d</sup> Alex K.-Y. Jen,<sup>c,e</sup> Dangyuan Lei,<sup>\*c,f</sup> Huimin Zhao<sup>\*a</sup>

<sup>a</sup> Key Laboratory of Industrial Ecology and Environmental Engineering (Ministry of Education China), School of Environmental Science and Technology, Dalian University of Technology, Dalian, 116024, China.

<sup>b</sup> Center for Water and Ecology, State Key Joint Laboratory of Environment Simulation and Pollution Control, School of Environment, Tsinghua University, Beijing, 100084, China.

<sup>c</sup> Department of Materials Science and Engineering, City University of Hong Kong, Hong Kong, 999077, China.

<sup>d</sup> Key Laboratory of Integrated Regulation and Resource Development on Shallow Lake of Ministry of Education, College of Environment, Hohai University, Nanjing, 210098, China.

<sup>e</sup> Department of Chemistry, City University of Hong Kong, Hong Kong, 999077, China.

<sup>f</sup> Department of Physics, Centre for Functional Photonics, Hong Kong Branch of National Precious Metals Material Engineering Research Centre, and Hong Kong Institute of Clean Energy, City University of Hong Kong, Hong Kong, 999077, China.

<sup>†</sup> X. D., S. W. and Q. L. contributed equally to this work.

<sup>\*</sup> Corresponding authors Email: zhaohuim@dlut.edu.cn; dangylei@cityu.edu.hk

## 24 **Table of Contents for Electronic Supplementary Information**

|    |                                                                             |     |
|----|-----------------------------------------------------------------------------|-----|
| 25 | 1. Experimental Section.....                                                | S5  |
| 26 | 1.1 Chemicals and materials .....                                           | S5  |
| 27 | 1.2. Characterization instruments .....                                     | S5  |
| 28 | 1.3. Synthesis of COFs.....                                                 | S6  |
| 29 | 1.4. Synthesis of Ni-CDs .....                                              | S7  |
| 30 | 1.5. Synthesis of Ni-CDs/COFs .....                                         | S7  |
| 31 | 1.6. Photocatalytic H <sub>2</sub> O <sub>2</sub> production reaction ..... | S8  |
| 32 | 1.7. Measurement of apparent quantum yield.....                             | S8  |
| 33 | 1.8. Determination of solar-to-chemical conversion efficiency.....          | S9  |
| 34 | 1.9. Photocatalytic decomposition of H <sub>2</sub> O <sub>2</sub> .....    | S9  |
| 35 | 1.10. Mott-Schottky measurement.....                                        | S9  |
| 36 | 1.11. Photoelectrochemical measurement.....                                 | S10 |
| 37 | 1.12. Femtosecond transient absorption spectroscopic measurement .....      | S10 |
| 38 | 1.13. Electrochemical measurement of ORR and WOR.....                       | S11 |
| 39 | 1.14. Electron paramagnetic resonance measurement .....                     | S12 |
| 40 | 1.15. Colorimetric detection of $\cdot\text{O}_2^-$ by NBT method.....      | S13 |
| 41 | 1.16. Isotope labelling experiment.....                                     | S13 |
| 42 | 1.17. Cefalexin and orange II degradation through Fenton reaction .....     | S13 |
| 43 | 1.18. Computational methods .....                                           | S13 |
| 44 | 2. Supplementary Figures and Tables.....                                    | S15 |
| 45 | 2.1. SEM images of COFs and Ni-CDs/COFs.....                                | S15 |
| 46 | 2.2. TEM image of Ni-CDs.....                                               | S15 |
| 47 | 2.3. HADDF-STEM image of Ni-CDs .....                                       | S16 |
| 48 | 2.4. XPS spectra of Ni-CDs/COFs, Ni-CDs, O 1s and N 1s of Ni-CDs.....       | S16 |

|    |                                                                                                              |     |
|----|--------------------------------------------------------------------------------------------------------------|-----|
| 49 | 2.5. Elemental content measured by XPS .....                                                                 | S17 |
| 50 | 2.6. Content of Ni element measured by ICP .....                                                             | S17 |
| 51 | 2.7. Ni K-edge EXAFS fitting curves of Ni-foil, NiO, Ni <sub>2</sub> O <sub>3</sub> , NiPc and Ni-CDs in k-  |     |
| 52 | space.....                                                                                                   | S18 |
| 53 | 2.8. FT-EXAFS curves at R-space for Ni K-edge of Ni-foil, NiO, Ni <sub>2</sub> O <sub>3</sub> and NiPc.      | S19 |
| 54 | 2.9. EXAFS fitting parameters for Ni K-edge of Ni-CDs, standard Ni-foil, NiO, Ni <sub>2</sub> O <sub>3</sub> |     |
| 55 | and NiPc.....                                                                                                | S20 |
| 56 | 2.10. Optimization of ratio of Ni-CDs and COFs .....                                                         | S21 |
| 57 | 2.11. Time-dependent photocatalytic H <sub>2</sub> O <sub>2</sub> production by Ni-CDs and Ni-CDs/COFs in    |     |
| 58 | pure water.....                                                                                              | S21 |
| 59 | 2.12. Composition of yield, AQY and SCC efficiency of various photocatalytic system                          |     |
| 60 | in H <sub>2</sub> O <sub>2</sub> production.....                                                             | S22 |
| 61 | 2.13. H <sub>2</sub> O <sub>2</sub> yield of various photocatalysts with sacrificial agent.....              | S24 |
| 62 | 2.14. Cyclic photocatalytic production of H <sub>2</sub> O <sub>2</sub> by Ni-CDs/COFs .....                 | S25 |
| 63 | 2.15. SEM image of Ni-CDs/COFs after photocatalytic H <sub>2</sub> O <sub>2</sub> production .....           | S25 |
| 64 | 2.16. XRD pattern of Ni-CDs/COFs after photocatalytic H <sub>2</sub> O <sub>2</sub> production .....         | S26 |
| 65 | 2.17. FT-IR spectrum of Ni-CDs/COFs after photocatalytic H <sub>2</sub> O <sub>2</sub> production.....       | S26 |
| 66 | 2.18. Photocatalytic H <sub>2</sub> O <sub>2</sub> production by Ni-CDs/COFs after storage for 4 weeks ..    | S27 |
| 67 | 2.19. Photocatalytic H <sub>2</sub> O <sub>2</sub> decomposition under light irradiation.....                | S27 |
| 68 | 2.20. Degradation of Orange II and cefalexin.....                                                            | S28 |
| 69 | 2.21. H <sub>2</sub> O <sub>2</sub> yield of various immobilized photocatalysts.....                         | S28 |
| 70 | 2.22. UV-vis DRS spectrum of COFs.....                                                                       | S29 |
| 71 | 2.23. Mott-Schottky plots of COFs and Ni-CDs/COFs .....                                                      | S29 |
| 72 | 2.24. VB XPS spectra of COFs and Ni-CDs/COFs .....                                                           | S30 |
| 73 | 2.25. LUMO and HOMO of COFs .....                                                                            | S30 |

|    |                                                                                                                                   |     |
|----|-----------------------------------------------------------------------------------------------------------------------------------|-----|
| 74 | 2.26. SEM image, XRD pattern and FT-IR spectrum of CDs/COFs.....                                                                  | S31 |
| 75 | 2.27. EIS spectra and Bode-phase plots of COFs, CDs/COFs and Ni-CDs/COFs....                                                      | S31 |
| 76 | 2.28. Photocurrent of COFs, CDs/COFs and Ni-CDs/COFs.....                                                                         | S32 |
| 77 | 2.29. fs-TA spectra of COFs, CDs/COFs and Ni-CDs/COFs probed at different time                                                    |     |
| 78 | delays .....                                                                                                                      | S32 |
| 79 | 2.30. Normalized fs-TA decay dynamics of COFs, CDs/COFs and Ni-CDs/COFs                                                           |     |
| 80 | probed at 530 nm .....                                                                                                            | S33 |
| 81 | 2.31. Time-dependent photocatalytic H <sub>2</sub> O <sub>2</sub> production by CDs/COFs and CDs in pure                          |     |
| 82 | water.....                                                                                                                        | S33 |
| 83 | 2.32. Photocatalytic H <sub>2</sub> O <sub>2</sub> production by Ni-CDs/COFs with different scavengers..                          | S34 |
| 84 | 2.33. LSV plots of COFs, CDs/COFs and Ni-CDs/COFs measured by RDE .....                                                           | S34 |
| 85 | 2.34. RRDE measurement for H <sub>2</sub> O <sub>2</sub> formation in ORR process .....                                           | S35 |
| 86 | 2.35. EPR spectra of $\cdot\text{O}_2^-$ , $^1\text{O}_2$ and $\cdot\text{OH}$ for Ni-CDs/COFs .....                              | S35 |
| 87 | 2.36. Detection of $\cdot\text{O}_2^-$ through NBT method.....                                                                    | S36 |
| 88 | 2.37. H <sub>2</sub> <sup>18</sup> O isotope experiment to explore H <sub>2</sub> O <sub>2</sub> evolution though WOR process ... | S36 |
| 89 | 2.38. RRDE measurement for O <sub>2</sub> formation in WOR process .....                                                          | S37 |
| 90 | 2.39. In-situ Raman spectra of Co-CDs/COFs and Mn-CDs/COFs in photocatalytic                                                      |     |
| 91 | water oxidation.....                                                                                                              | S37 |
| 92 | 2.40. Photocatalytic H <sub>2</sub> O <sub>2</sub> production by Co-CDs/COFs and Mn-CDs/COFs .....                                | S38 |
| 93 | 2.41. Formation energy of O* on carbon atom, O* on nickel atom and OOH* on carbon                                                 |     |
| 94 | atom.....                                                                                                                         | S38 |
| 95 | 2.42. Formation energy of O <sub>2</sub> and H <sub>2</sub> O <sub>2</sub> from OOH* .....                                        | S39 |
| 96 | 2.43. Formation energy of OH* on carbon atom, O* on nickel atom and OH* on nickel                                                 |     |
| 97 | atom, O* on carbon atom .....                                                                                                     | S39 |
| 98 | References.....                                                                                                                   | S40 |

## 1. Experimental Section

### 1.1 Chemicals and materials

The following reagents were used in fabrication of photocatalysts, measurement of  $\text{H}_2\text{O}_2$  concentration and investigation of  $\text{H}_2\text{O}_2$  generation procedure: 1,4-dioxane, 1,3,5-triformylphloroglucinol, 3,9-diamino-benzo[1,2-b:4,5-b'] bis[1]benzothiophene-5,5,11,11-tetraoxide, horseradish peroxidase (HRP), N, N-dimethylformamide (DMF), cefalexin, 5,5-dimethyl-1-pyrroline N-oxide (DMPO), orange II,  $\text{KBrO}_3$ , p-benzoquinone (p-BQ), p-tert-butanol (TBA), nitro blue tetrazolium (NBT), 2,2,6,6-tetramethylpiperidine (TEMP) and water- $^{18}\text{O}$  ( $\text{H}_2^{18}\text{O}$ ) (Shanghai Aladdin Bio-Chem Technology Co., Ltd., China); Monometallic sodium orthophosphate ( $\text{NaH}_2\text{PO}_4$ ), dibasic sodium phosphate ( $\text{Na}_2\text{HPO}_4$ ), sodium sulfate ( $\text{Na}_2\text{SO}_4$ ), hydrogen peroxide ( $\text{H}_2\text{O}_2$ ) solution (30%, wt.%), acetone and ethanol absolute, citric acid, melamine, dichloromethane, isopropanol, methanol (MeOH), ethylenediaminetetraacetic acid disodium salt (EDTA-2Na), nickel chloride hexahydrate ( $\text{NiCl}_2 \cdot 6\text{H}_2\text{O}$ ) and sodium periodate ( $\text{NaIO}_4$ ) (Tianjin Bodi chemical Co., Ltd., China); N, N-diethyl p-phenylenediamine sulfate (DPD) (Tianjin Guangfu Fine Chemical Research Institute, China); Manganese dioxide ( $\text{MnO}_2$ ) and ferrous sulfate ( $\text{FeSO}_4$ ) (Tianjin Damao Chemical Reagent Factory, China); Magnesium nitrate ( $\text{Mg}(\text{NO}_3)_2$ ) (Tianjin Dingshengxin Chemical Industry Co., Ltd., China) Phosphate buffer saline (PBS) (Beijing Solarbio Science & Technology Co., Ltd., China); Ultrapure water was received from purification system (Millipore;  $\geq 18 \text{ M}\Omega$ ). Tap water, lake water and sea water were obtained from local laboratory, Xishan lake (Dalian, China) and yellow sea.

### 1.2. Characterization instruments

X-ray powder diffraction (XRD) pattern was recorded by a D8 Advance X-

ray diffractometer with Cu K $\alpha$  radiation,  $\lambda = 1.5406 \text{ \AA}$  (Bruker, Germany). Scanning electron microscopy (SEM) images were recorded on an S-4800 field emission scanning electron microscope (Hitachi, Japan). Transmission electron microscopy (TEM) equipped with energy dispersive X-ray spectroscopy (EDS, X-MAX20) were recorded on a JEM F200 transmission electron microscope (JEOL, Japan). Ultraviolet-visible diffuse reflectance spectra (UV-Vis DRS) were performed by a V-550 spectrometer (Shimadzu, Japan). Photoluminescence (PL) spectra were measured on a Hitachi F-7600 spectrophotometer (Japan). X-ray photoelectron spectroscopy (XPS) was recorded by a Thermo Scientific K-Alpha+ instrument with Al K $\alpha$  X-ray irradiation (UK). The aberration-corrected high-angle annular dark field transmission electron microscopy (HAADF-TEM) was conducted on a FEI Titan G2 60-300 microscope (USA) with a Schottky cold-field emission gun. The Ni K-edge X-ray absorption study was performed at the BL14B2 of SPring-8 station (Japan). The inductively coupled plasma (ICP) spectroscopy analysis was conducted on a Optima2000DV instrument (USA). The femtosecond transient absorption (fs-TA) spectra were measured with a commercial TA system (TA100, Time-Tech Spectra, China). Electron paramagnetic resonance (EPR) spectra were recorded on a E500 EPR spectrometer (Bruker, Germany). In-situ Raman spectra were collected on an inVia Qontor confocal micro Raman spectrometer (Renishaw PLC, England). Gas chromatography-mass spectrometry (GC-MS) analysis was conducted using the Shimadzu GCMS-QP2020 instrument (Japan).

### 1.3. Synthesis of COFs

Firstly, 10.5 mg 1,3,5-triformylphloroglucinol and 28.8 mg 3, 9-diaminobenzo[1,2-b:4,5- b']bis[1]benzothiophene-5,5,11,11-tetraoxide were added in a mixture

solution with 1.5 mL 1,4-dioxane, 1.5 mL mesitylene and 0.3 mL acetic acid (3 mol L<sup>-1</sup>). After the sonication for 10 min, the mixture was degassed with a vacuum pump. Then the sample was put into a refrigerator at -80 °C for freezing. The degassed procedure was further performed in the thawing of mixture. After three freeze-thaw cycles, mixture was kept at 120 °C under a vacuum environment for three days. The obtained solid was washed with N, N-dimethylformamide and acetone for several times. Finally, the red sample was dried by a vacuum freezing process.

#### **1.4. Synthesis of Ni-CDs**

The Ni single atom anchored carbon dots (Ni-CDs) were fabricated via a microwave heat-treatment method. 3 g citric acid, 1 g urea and 0.5 g NiCl<sub>2</sub>·6H<sub>2</sub>O were dissolved in 8 mL ultrapure water under vigorously stirring. Then, the transparent solution was moved into the microwave digestion tank and reacted for 10 min with power mode of 600 W. After the reaction, the colorless liquid was transformed into a dark brown solid. Subsequently, the solid was heated at 80 °C for 12 h to remove small residual molecules. The mixture was then dispersed in ultrapure water and centrifuged at 9000 rpm for 1 h to remove agglomerated large particles. The obtained brown solution was further eluted via a mixture of dichloromethane and methanol with a volume ratio of 1:1. The dialysis of solution was further performed with the dialysis tube (1000 molecular weight for trapped molecule) in ultrapure water. The resultant product was obtained after the vacuum freezing drying. The CDs were prepared through above procedure without the addition of Ni-containing precursor.

#### **1.5. Synthesis of Ni-CDs/COFs**

The 28 mg COFs were dispersed in 10 mL DMF under ultrasonic irradiation. Then 2 mg Ni-CDs were added into the above solution under vigorously stirring for 1 h. The resulting mixture was dried at 80 °C to completely evaporate DMF. The solid was

further washed with ultrapure water and centrifuged at 9000 rpm for 10 min. The final powder was obtained after drying at 80 °C and denoted as Ni-CDs/COFs. The hybrid of COFs and CDs was further prepared and named as CDs/COFs.

#### **1.6. Photocatalytic H<sub>2</sub>O<sub>2</sub> production reaction**

The 10 mg photocatalyst was added in 50 mL of ultrapure water and ultrasonically dispersed for 20 min. Then the suspension was continuously filled with O<sub>2</sub> and kept stirring for another 20 min in dark. After that, the reaction solution was irradiated under a Xenon lamp (PLS-SXE300D/DUV, Perfect light) with a 420 nm cutoff film. The reaction temperature of mixture was controlled at 25 °C under a circulating water. During the catalytic process, 2.5 mL of reaction solution was taken out every 10 min and filtrated through a 0.22 µm PES filter to remove photocatalyst. The concentration of H<sub>2</sub>O<sub>2</sub> was measured by an enzyme-based colorimetric method. Sodium phosphate buffer was prepared through mixing 87.7 mL NaH<sub>2</sub>PO<sub>4</sub> solution (1 mol L<sup>-1</sup>), 12.6 mL Na<sub>2</sub>HPO<sub>4</sub> solution (1 mol L<sup>-1</sup>) in 99.7 mL ultrapure water. The N, N-diethyl p-phenylenediamine sulfate (DPD) solution and horseradish peroxidase (HRP) solution were prepared by adding 0.1 g DPD in 10 mL sulfuric acid (H<sub>2</sub>SO<sub>4</sub>) solution (0.1 mol L<sup>-1</sup>) and 3 mg HRP in 3 mL ultrapure water. For the H<sub>2</sub>O<sub>2</sub> concentration test process, 0.4 mL sodium phosphate buffer, 0.05 mL DPD solution and 0.05 mL HRP solution were mixed with 2 mL filtered sample and kept 90 s. The content of generated H<sub>2</sub>O<sub>2</sub> was then determined at 551 nm over a SP-756P UV-vis spectrophotometer.

#### **1.7. Measurement of apparent quantum yield**

The apparent quantum yield (AQY) of Ni-CDs/COFs was measured under Xenon lamp irradiation with single-wavelength light at 420 nm, 500 nm, 550 nm, 600 nm, 650 nm and 700 nm. The photocatalytic reaction was performed at 25 °C in ultrapure water. The AQY was calculated based on the following Equation (S1).<sup>1,2</sup>



$$\begin{aligned}
 199 \quad AQY &= \frac{(\text{number of } H_2O_2 \text{ production}) \times 2}{\text{number of incident photons}} \times 100\% \\
 200 \quad &= \frac{2 \times N_a \times M}{\frac{P \times S \times t \times \lambda}{h \times c}} = \frac{2 \times N_a \times M \times h \times c}{S \times P \times t \times \lambda}
 \end{aligned}$$

201 Where  $N_a$  is the Avogadro constant ( $6.022 \times 10^{23} \text{ mol}^{-1}$ ),  $M$  is the amount of  
 202 produced  $H_2O_2$  molecule (mol),  $h$  is the Plank's constant ( $6.626 \times 10^{-34} \text{ J s}$ ),  $c$  is  
 203 the speed of light in free space ( $3 \times 10^8 \text{ m s}^{-1}$ ),  $S$  is the irradiation area ( $1 \times 10^{-4}$   
 204  $\text{m}^2$ ),  $P$  is the intensity of irradiation light ( $16.2 \text{ mW cm}^{-2}$  at  $429 \text{ nm}$ ),  $t$  is the  
 205 photoreaction time (s),  $\lambda$  is the wavelength length of the monochromatic light (m).

## 206 1.8. Determination of solar-to-chemical conversion efficiency

207 The solar-to-chemical conversion (SCC) efficiency was evaluated using a Xe lamp  
 208 with an AM 1.5G filter as simulated natural light source and calculated according to the  
 209 following Equation (S2)<sup>3,4</sup>:

$$\begin{aligned}
 210 \quad SCC (\%) &= \frac{(\Delta G \text{ for } H_2O_2 \text{ generation}) \times (\text{number of formed } H_2O_2)}{P \times t} \times 100\% \\
 211 \quad &= \frac{\Delta G \times M}{P \times t} \times 100\%
 \end{aligned}$$

212 Where  $\Delta G = 117 \text{ kJ mol}^{-1}$ ,  $M$  is the amount of formed  $H_2O_2$  molecule (mol),  $P$  is  
 213 the total input power (W),  $t$  is the reaction time (s).

## 214 1.9. Photocatalytic decomposition of $H_2O_2$

215 The photocatalytic decomposition of  $H_2O_2$  was measured with addition of 10 mg  
 216 photocatalyst in 50 mL  $H_2O_2$  aqueous solution ( $10 \text{ mmol L}^{-1}$ ). The light source and  
 217 reaction temperature in  $H_2O_2$  decomposition measurement was the same as those in  
 218  $H_2O_2$  production test. During the decomposition reaction, 2.5 mL sample collected  
 219 every 10 min and was filtered to remove photocatalyst. The  $H_2O_2$  concentration was  
 220 measured using the enzyme-based colorimetric method.

## 221 1.10. Mott-Schottky measurement

Mott-Schottky curves were tested with a frequency of 1000 Hz, 1500 Hz and 2000 Hz in a 0.1 mol L<sup>-1</sup> Na<sub>2</sub>SO<sub>4</sub> solution. Then the potentials of flat band of photocatalysts were obtained by fitting the curves and transformed to the value (vs normal hydrogen electrode (NHE)) based on the equation (S3) and equation (S4).<sup>5-7</sup>

$$(RHE) = E(SCE) + 0.0591 \text{ pH} + 0.24 \quad \text{Equation (S3)}$$

$$E(RHE) = E(NHE) + 0.0591 \text{ pH} \quad \text{Equation (S4)}$$

### 1.11. Photoelectrochemical measurement

The electrochemical impedance spectroscopy (EIS) was measured on a PARSTAT 2273 electrochemical system (Princeton, USA) with frequency of 0.1 Hz~2 MHz under visible light irradiation. The samples coated fluoride tin oxide glass (FTO) electrode, graphite sheet and Ag/AgCl electrode were used as working electrode, counter electrode and reference electrode. The samples coated fluoride tin oxide glass (FTO) electrode was prepared as follows: The FTO was previously cleaned by sonication in the solution with a sequence as acetone, ethanol and water. After that, the samples and Mg(NO<sub>3</sub>)<sub>2</sub> were dispersed in isopropanol solution with concentration of 1 g L<sup>-1</sup> and 0.05 g L<sup>-1</sup>, respectively. The samples were finally deposited on FTO via an electrophoresis process under 10 V for 2 min. The photocurrent-time measurement was performed with a three-electrode system as that in EIS measurement. During the visible-light on and off over time, the transient photocurrent was obtained in 0.1 M Na<sub>2</sub>SO<sub>4</sub> solution (O<sub>2</sub>-saturated) at applied voltage of 0 V.

### 1.12. Femtosecond transient absorption spectroscopic measurement

Femtosecond transient absorption spectroscopic measurement was conducted using a Yb:KGW laser (Pharos, Light Conversion Ltd., Lietuvos). The

wavelength of fundamental output was at 1030 nm. For generation of 400 nm pump pulses, the second harmonic of 2HNOPA (Orpheus-N-2H, Light Conversion Ltd. Lietuvos) with output length at 800 nm was used. The probe pulses were generated through supercontinuum, where a small fraction of the fundamental 1030 nm laser was focused into a sapphire plate for visible detection, or a small fraction of the SHG of 1030 nm was focused into a CaF<sub>2</sub> plate for near UV detection. Time delay between the pump and probe pulses was controlled by a delay line. The fs-TA signals were measured using the commercial TA100 system. The pulse-to-pulse spectral analysis was conducted at 10 kHz for the visible detection. The signal-to-noise ratio ( $\Delta O.D.$ ) was better than  $1 \times 10^{-5}$  after averaging 5000 pump-on and pump-off shots for each data point.

### **1.13. Electrochemical measurement of ORR and WOR**

The number of transferred electrons of photocatalyst in oxygen reduction reaction (ORR) was measured through rotating disk electrode (RDE) measurements, which were performed on a Pine AFMSRXE electrochemical system (UK) with a CHI760E electrochemical workstation (Chenhua, China) by a three-electrode configuration test cell. In the three-electrode setup, the samples coated glassy carbon electrode, Hg/HgCl electrode and graphite rod were used as working electrode, reference electrode and counter electrode. The preparation of sample coated glassy carbon electrode was based on the following process: 2.5 mg samples were dispersed in a mixture solution of 985  $\mu\text{L}$  of ultrapure water, 15  $\mu\text{L}$  of isopropanol and 15  $\mu\text{L}$  of Nafion solution (5 wt.%). Then catalyst slurry was drop-added on the surface of glassy carbon electrode and dried at room temperature under natural air. The linear sweep voltammograms (LSV) were performed in O<sub>2</sub>-saturated phosphate buffer solution (concentration of 0.1 mol L<sup>-1</sup>

<sup>1</sup>, pH = 7) with the rotation speeds at 400 rpm, 900 rpm, 1200 rpm and 1600 rpm.

The Koutecky-Levich (K-L) equations are as follows<sup>9,10</sup>:

$$J^{-1} = J_k^{-1} + B^{-1}\omega^{-1/2} \quad \text{Equation (S5)}$$

$$B = 0.2nF\nu^{-1/6}CD^{2/3} \quad \text{Equation (S6)}$$

Where J is current density,  $J_k$  is kinetic current density,  $\omega$  is rotating speed (rpm), F is Faraday constant (96485 C mol<sup>-1</sup>),  $\nu$  is kinetic viscosity of water (0.01 cm<sup>2</sup> s<sup>-1</sup>), C is bulk concentration of O<sub>2</sub> in water (1.26×10<sup>-3</sup> mol cm<sup>-3</sup>), and D is diffusion coefficient of O<sub>2</sub> (2.7×10<sup>-5</sup> cm<sup>2</sup> s<sup>-1</sup>).

Rotating ring disk electrode (RRDE) test was also conducted to study ORR and water oxidation reaction (WOR) with sample coated electrode as working electrode. The LSV polarization curves of ORR and WOR were recorded in 0.1 mol L<sup>-1</sup> phosphate buffer solution (pH = 7) with sweep rate of 10 mV s<sup>-1</sup> at 1000 rpm. For the ORR measurement in an O<sub>2</sub>-saturated solution, potential range on disk electrode was set to -1~0 V vs Ag/AgCl and the fixing potential on ring electrode as 0.75 V vs Ag/AgCl. During WOR measurement, the potential on disk electrode ranged from 1.0 V to 2.1 V and the potential on ring electrode was set as -0.25 V vs Ag/AgCl and 0.75 V vs Ag/AgCl to measure O<sub>2</sub> and H<sub>2</sub>O<sub>2</sub> production in an Ar atmosphere.

#### 1.14. Electron paramagnetic resonance measurement

The electron paramagnetic resonance was conducted to detect superoxide radical or hydroxide radical with addition of DMPO as spin-trapping reagent and singlet oxygen with addition of TEMP as spin-trapping reagent. The photocatalyst was dispersed in ultrapure water for detection of hydroxide radical and singlet oxygen and in MeOH for detection of superoxide radical in a Pyrex glass sealed with rubber septum cap under visible light irradiation.

### **1.15. Colorimetric detection of $\cdot\text{O}_2^-$ by NBT method**

Ni-CDs/COFs was dispersed in NBT aqueous solution and the suspension was stirred in the dark for 20 min. After light irradiation, 2.5 mL sample was taken out and filtrated through a 0.22  $\mu\text{m}$  PES filter to remove photocatalyst. The absorbance of samples was measured via a UV-vis spectrophotometer.

### **1.16. Isotope labelling experiment**

1 mg Ni-CDs/COFs was dispersed in 1 mL  $\text{H}_2^{18}\text{O}$ . Then 1 mg  $\text{NaIO}_4$  was added as electron scavenger. The air was then evacuated and Ar was flowed into the reactor. Mixture was further exposed to light source for 2 h. The gas products were analyzed using GC-MS. After that,  $\text{MnO}_2$  was added into solution and reactor was sealed again. The mixture was sonicated for 5 min, and the resulting gas products were analyzed again through GC-MS.

### **1.17. Cefalexin and orange II degradation through Fenton reaction**

The cefalexin aqueous solution with concentration of 10  $\text{mg L}^{-1}$  and orange II aqueous solution with concentration of 25  $\text{mg L}^{-1}$  were firstly prepared. Then, 5 mL filtered photocatalytic reaction solution and 95 mL above cefalexin solution or orange II solution were uniformly mixed before adding 1.5 mg  $\text{FeSO}_4$ . During the Fenton reaction, 3 mL of sample was taken out every 3 min in cefalexin degradation and every 2 min in orange II degradation with quick addition of 20  $\mu\text{L}$  isopropanol. The content of orange II was detected at 486 nm by a UV-vis spectrophotometer. The concentration of cefalexin was measured by a Waters 2695 high performance liquid chromatography (HPLC; USA).

### **1.18. Computational methods**

The density functional theoretical calculation was performed through the density functional theory (DFT) by the Gaussian 09W. The geometry

optimization was carried out using B3LYP with 6-31G (d) basis sets. The lowest unoccupied molecular orbitals (LUMO) and highest occupied molecular orbitals (HOMO) are calculated based on optimized structure and analyzed by Multiwfn 3.8 software.<sup>11,12</sup> High accuracy energies were calculated by using the 6-311G (d) basis sets. The reaction free energy as  $\Delta G$  was calculated according to the equation (S7).<sup>13,14</sup>

$$\Delta G = \Delta E + \Delta ZPE - T\Delta S \quad \text{Equation (S7)}$$

Where  $\Delta E$  is the energy change between reactants and intermediates, ZPE is the zero-point energy, T is the temperature set as 298.15 K, S is the entropy energy.

## 2. Supplementary Figures and Tables

### 2.1. SEM images of COFs and Ni-CDs/COFs

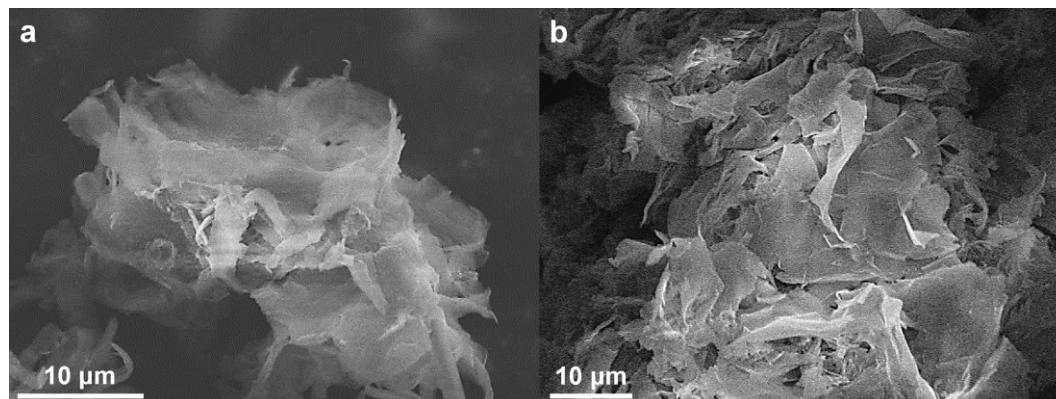

**Fig. S1** SEM images of (a) COFs and (b) Ni-CDs/COFs.

### 2.2. TEM image of Ni-CDs

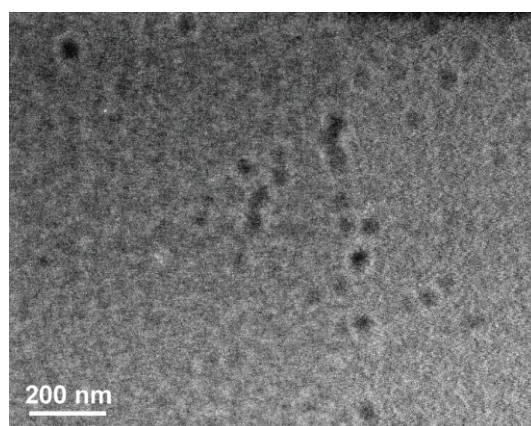

**Fig. S2** TEM image of Ni-CDs.

### 2.3. HADDF-STEM image of Ni-CDs

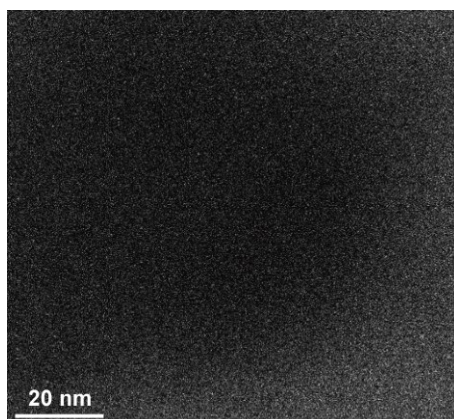

Fig. S3 HADDF-STEM image of Ni-CDs.

### 2.4. XPS spectra of Ni-CDs/COFs, Ni-CDs, O 1s and N 1s of Ni-CDs

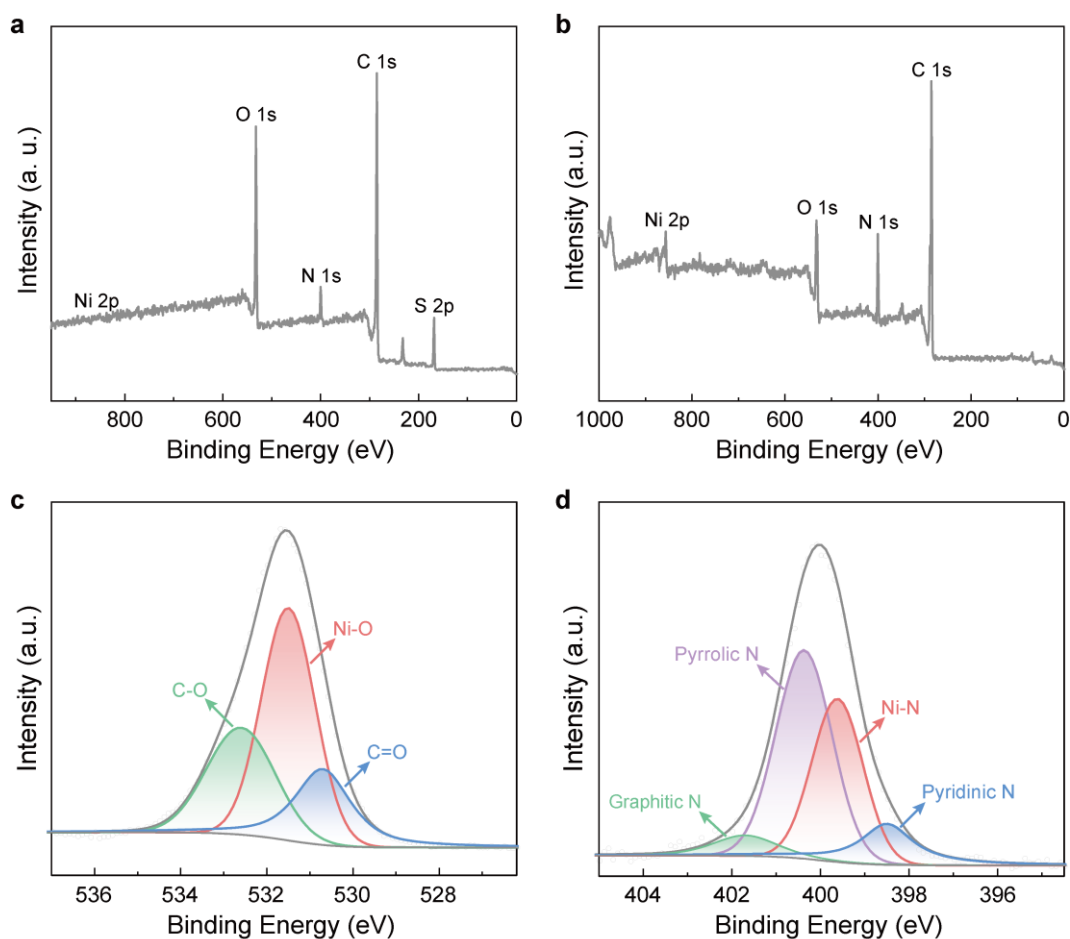

Fig. S4 XPS spectra of (a) Ni-CDs/COFs and (b) Ni-CDs. High-resolution XPS spectra of (c) O 1s and (d) N 1s in Ni-CDs.



## 2.5. Elemental content measured by XPS

**Table S1** XPS elemental content of Ni-CDs.

| Element  | Content (wt.%) |
|----------|----------------|
| Carbon   | 60.30          |
| Nickel   | 10.54          |
| Nitrogen | 10.31          |
| Oxygen   | 18.85          |

## 2.6. Content of Ni element measured by ICP

**Table S2** ICP result of Ni content in Ni-CDs.

| Element | Content (wt.%) |
|---------|----------------|
| Nickel  | 10.25          |

## 2.7. Ni K-edge EXAFS fitting curves of Ni-foil, NiO, Ni<sub>2</sub>O<sub>3</sub>, NiPc and Ni-CDs in k-space

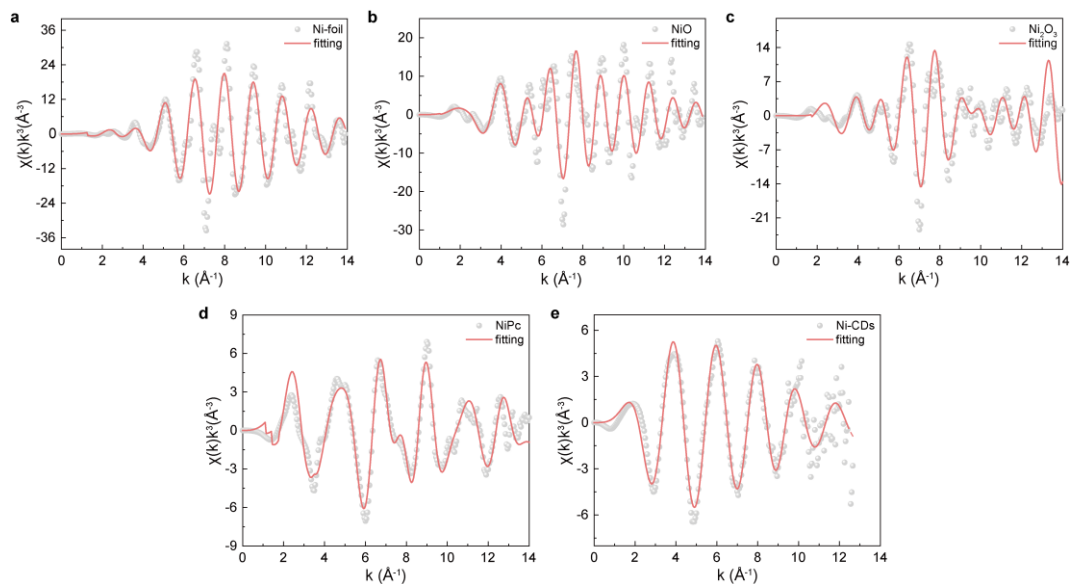

**Fig. S5** Ni K-edge EXAFS fitting curves of (a) Ni-foil, (b) NiO, (c) Ni<sub>2</sub>O<sub>3</sub>, (d) NiPc and (e) Ni-CDs in k-space.

## 2.8. FT-EXAFS curves at R-space for Ni K-edge of Ni-foil, NiO, Ni<sub>2</sub>O<sub>3</sub> and NiPc

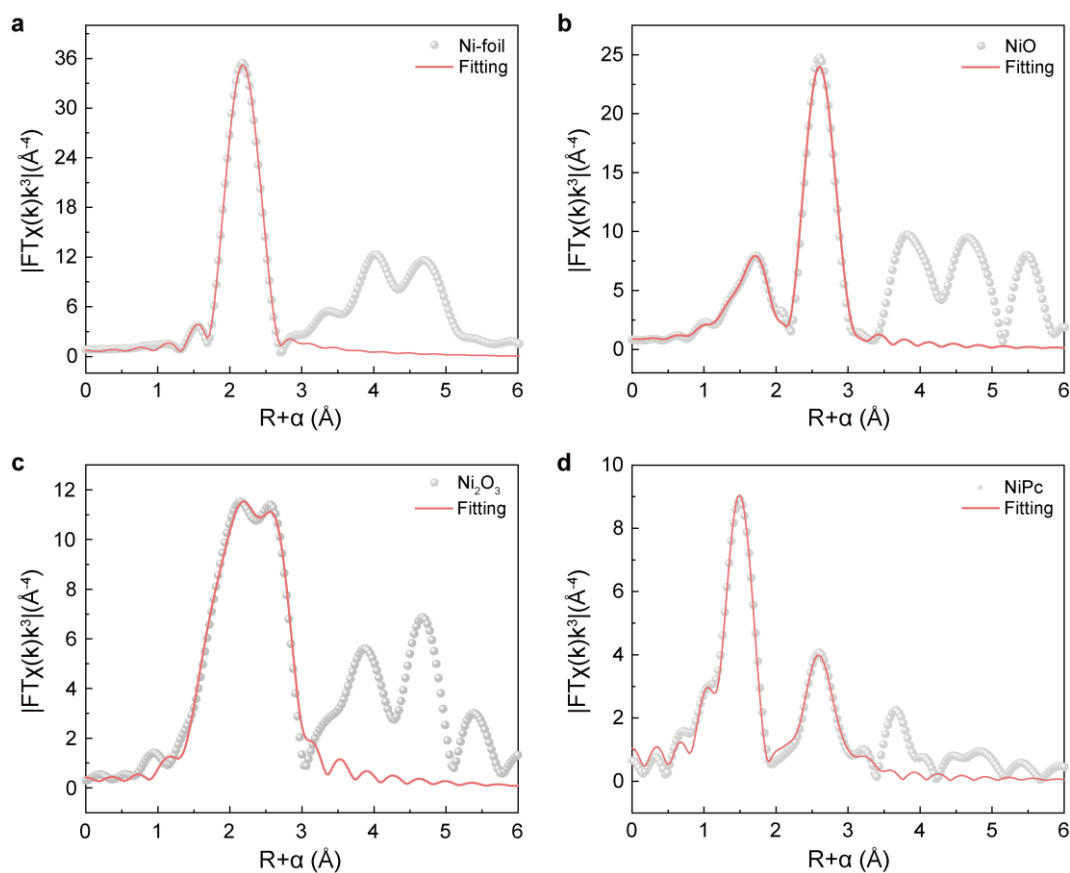

**Fig. S6** FT-EXAFS curves at R-space for Ni K-edge of (a) Ni-foil, (b) NiO, (c) Ni<sub>2</sub>O<sub>3</sub> and (d) NiPc.

## 2.9. EXAFS fitting parameters for Ni K-edge of Ni-CDs, standard Ni-foil, NiO, Ni<sub>2</sub>O<sub>3</sub> and NiPc

**Table S3** EXAFS fitting parameters for Ni K-edge of Ni-CDs, standard Ni-foil, NiO, Ni<sub>2</sub>O<sub>3</sub> and NiPc.

| Sample                         | Shell | C.N.     | R (Å)       | $\sigma^2$ (Å <sup>2</sup> ) | $\Delta E_0$ (eV) | R factor |
|--------------------------------|-------|----------|-------------|------------------------------|-------------------|----------|
| Ni-foil                        | Ni-Ni | 12.0     | 2.486±0.002 | 0.0063±0.0003                | 6.3±0.4           | 0.0013   |
| NiO                            | Ni-O  | 6.0±0.7  | 2.094±0.001 | 0.0071±0.0017                | 4.0±0.6           | 0.0052   |
|                                | Ni-Ni | 12.3±0.9 | 2.948±0.001 | 0.0069±0.0006                | 0.7±0.3           |          |
| Ni <sub>2</sub> O <sub>3</sub> | Ni-O  | 3.8±0.5  | 2.103±0.001 | 0.0009±0.0014                | 11.3±0.7          | 0.0049   |
|                                | Ni-Ni | 7.4±1.0  | 2.773±0.001 | 0.0018±0.0012                | -12.2±0.5         |          |
| NiPc                           | Ni-N  | 4.0±0.2  | 1.890±0.001 | 0.0030±0.0007                | 4.8±0.4           | 0.0039   |
|                                | Ni-C  | 7.8±1.5  | 2.935±0.001 | 0.0039±0.0018                | 7.6±0.7           |          |
| Ni-CDs                         | Ni-N  | 2.9±0.1  | 2.003±0.001 | 0.0010±0.0004                | 11.9±1.1          | 0.0005   |
|                                | Ni-O  | 1.1±0.1  | 2.113±0.003 |                              | -3.4±0.2          |          |

C.N., coordination numbers; R, interatomic distance;  $\sigma^2$ , Debye-Waller factors;  $\Delta E_0$ , inner potential correction; R factor, goodness of fit;  $S_0^2$  was fixed to 0.807 as determined from Ni foil fitting.

## 2.10. Optimization of ratio of Ni-CDs and COFs

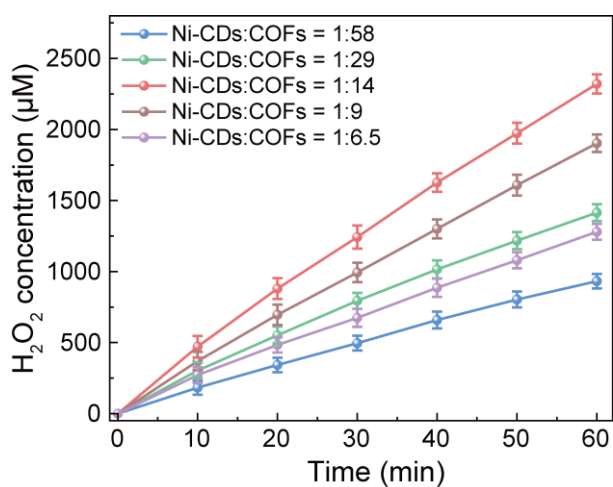

Fig. S7 Optimization of ratio of Ni-CDs and COFs.

## 2.11. Time-dependent photocatalytic $\text{H}_2\text{O}_2$ production by Ni-CDs and Ni-CDs/COFs in pure water

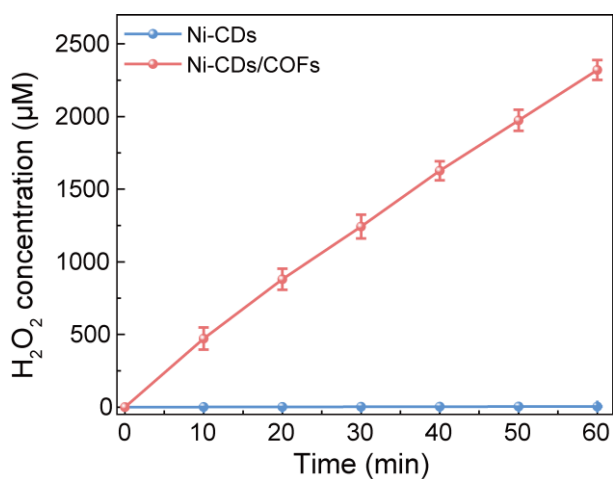

Fig. S8 Time dependent photocatalytic  $\text{H}_2\text{O}_2$  production by Ni-CDs and Ni-CDs/COFs in pure water.

## 2.12. Composition of yield, AQY and SCC efficiency of various photocatalytic system in H<sub>2</sub>O<sub>2</sub> production

**Table S4** Comparison of yield, AQY and SCC efficiency of various photocatalytic system in H<sub>2</sub>O<sub>2</sub> production.

| Catalyst                      | Solution and concentration          | Light Source | Formed H <sub>2</sub> O <sub>2</sub> (μmol h <sup>-1</sup> g <sup>-1</sup> ) | AQY (%)        | SCC (%) | Ref.      |
|-------------------------------|-------------------------------------|--------------|------------------------------------------------------------------------------|----------------|---------|-----------|
| Ni-CDs/COFs                   | Pure water, 0.2 g L <sup>-1</sup>   | λ ≥ 420 nm   | 11603                                                                        | 20.4 (420 nm)  | 1.56    | This work |
| PI-BD-TPB                     | Pure water, 0.75 g L <sup>-1</sup>  | Xe-lamp      | 3777.3                                                                       | 14.28 (420 nm) | 0.92    | 15        |
| Kf-AQ                         | Pure water, 0.17 g L <sup>-1</sup>  | λ > 400 nm   | 4784                                                                         | 15.8 (400 nm)  | 0.7     | 16        |
| TTF@Por-COF-cya               | Pure water, 0.1 g L <sup>-1</sup>   | λ > 420 nm   | 6994                                                                         | 14.98 (420 nm) | N. T.   | 17        |
| Ca(II)@ACG                    | Pure water, 0.2 g L <sup>-1</sup>   | λ > 420 nm   | 1021.5                                                                       | 3.12 (420 nm)  | N. T.   | 18        |
| o-COF-TpPzda                  | Pure water, 0.125 g L <sup>-1</sup> | λ > 420 nm   | 4396                                                                         | N. T.          | 0.46    | 19        |
| Hz-TP-BT-COF                  | Pure water, 0.2 g L <sup>-1</sup>   | λ ≥ 420 nm   | 5700                                                                         | 17.5 (420 nm)  | N. T.   | 20        |
| C <sub>5</sub> N <sub>2</sub> | Pure water, 1 g L <sup>-1</sup>     | Xe-lamp      | 1343.6                                                                       | N. T.          | 0.26    | 21        |
| FS-COFs                       | Pure water, 0.4 g L <sup>-1</sup>   | λ ≥ 420 nm   | 3904.2                                                                       | 6.21 (420 nm)  | N. T.   | 22        |
| TAPT-FTPb COFs                | Pure water, 1 g L <sup>-1</sup>     | Xe-lamp      | 3780                                                                         | N. T.          | 1.22    | 23        |
| TPT-Cz-phCN                   | Pure water, 0.02 g L <sup>-1</sup>  | λ ≥ 400 nm   | 2534                                                                         | 19.1 (420 nm)  | 0.64    | 24        |

| Catalyst                    | Solution and concentration            | Light Source                  | Formed H <sub>2</sub> O <sub>2</sub> ( $\mu\text{mol h}^{-1} \text{g}^{-1}$ ) | AQY (%)           | SCC (%) | Ref. |
|-----------------------------|---------------------------------------|-------------------------------|-------------------------------------------------------------------------------|-------------------|---------|------|
| 20COFIS                     | Pure water,<br>0.17 g L <sup>-1</sup> | Xe-lamp                       | 5713.2                                                                        | 0.55<br>(420 nm)  | N. T.   | 25   |
| SA-TCPP                     | Pure Water,<br>1.5 g L <sup>-1</sup>  | $\lambda \geq 400 \text{ nm}$ | 440                                                                           | 14.9<br>(420 nm)  | 0.6     | 3    |
| TTF-BT-COF                  | Pure water,<br>0.5 g L <sup>-1</sup>  | Xe-lamp                       | 6900                                                                          | 11.2<br>(420 nm)  | 0.49    | 26   |
| TP-DPBD <sub>30</sub> -COF  | Pure water,<br>0.17 g L <sup>-1</sup> | $\lambda \geq 420 \text{ nm}$ | 7200                                                                          | 18<br>(420 nm)    | 0.91    | 27   |
| CTF-NSs                     | Pure water,<br>0.1 g L <sup>-1</sup>  | $\lambda > 420\text{nm}$      | 5007                                                                          | 16.8<br>(420 nm)  | 0.91    | 28   |
| CNW03                       | Pure water,<br>0.1 g L <sup>-1</sup>  | $\lambda \geq 420 \text{ nm}$ | 556                                                                           | 8.53<br>(420 nm)  | 0.31    | 29   |
| Ni <sub>SAPs</sub> -PuCN    | Pure water<br>1 g L <sup>-1</sup>     | $\lambda \geq 420 \text{ nm}$ | 342.2                                                                         | 10.9<br>(420 nm)  | 1.17    | 30   |
| g-COF-DMDP-2                | Pure water,<br>0.25 g L <sup>-1</sup> | $\lambda > 420\text{nm}$      | 3820                                                                          | 1.83<br>(420 m)   | N. T.   | 31   |
| S <sub>v</sub> -ZIS         | Pure water,<br>0.67 g L <sup>-1</sup> | $\lambda \geq 400 \text{ nm}$ | 1706.4                                                                        | 9.9<br>(420 nm)   | 0.81    | 32   |
| Hf-PMOF/APF                 | Pure water<br>0.2 g L <sup>-1</sup>   | Xe-lamp                       | 2995.1                                                                        | 4.53<br>(420 nm)  | N. T.   | 33   |
| CN-PDA                      | Pure water,<br>1.5 g L <sup>-1</sup>  | $\lambda \geq 400 \text{ nm}$ | 495.2                                                                         | 5.1<br>(400 nm)   | 0.14    | 34   |
| DMCR-1NH                    | Pure water,<br>0.46 g L <sup>-1</sup> | $\lambda > 420 \text{ nm}$    | 2588                                                                          | 10.1<br>(420 nm)  | N. T.   | 35   |
| TACOF-1-COOH                | Pure water,<br>0.14 g L <sup>-1</sup> | $\lambda > 420 \text{ nm}$    | 3542                                                                          | 5.7<br>(420 nm)   | 0.55    | 36   |
| CoO <sub>x</sub> -BCN-FeOOH | Pure water,<br>1 g L <sup>-1</sup>    | $\lambda \geq 420\text{nm}$   | 340                                                                           | 8.36%<br>(420 nm) | 0.95    | 37   |

## 2.13. H<sub>2</sub>O<sub>2</sub> yield of various photocatalysts with sacrificial agent

**Table S5** H<sub>2</sub>O<sub>2</sub> yield of various photocatalysts with sacrificial agent.

| Catalyst                               | Concentration          | Solution                       | Light source                | Formed H <sub>2</sub> O <sub>2</sub><br>( $\mu\text{mol h}^{-1} \text{g}^{-1}$ ) | Ref. |
|----------------------------------------|------------------------|--------------------------------|-----------------------------|----------------------------------------------------------------------------------|------|
| CN-KI <sub>3</sub> -KI-MV              | 0.5 g L <sup>-1</sup>  | Isopropanol (10 vol%) in water | $\lambda \geq 420\text{nm}$ | 46400                                                                            | 38   |
| TiO <sub>2</sub> /MoS <sub>x</sub> -Au | 0.1 g L <sup>-1</sup>  | Ethanol (10 vol %) in water    | Xe-lamp                     | 30440                                                                            | 39   |
| PAF-363                                | 0.02 g L <sup>-1</sup> | Ethanol (10 vol %) in water    | $\lambda > 420 \text{ nm}$  | 11733                                                                            | 40   |
| JNM-25                                 | 0.6 g L <sup>-1</sup>  | Isopropanol (10 vol%) in water | Xe-lamp                     | 17476                                                                            | 41   |
| TFPA-TAPT-COF-Q                        | 0.5 g L <sup>-1</sup>  | Benzyl alcohol (10%) in water  | Xe-lamp                     | 11832                                                                            | 42   |
| CN-KCl/KI                              | 0.2 g L <sup>-1</sup>  | Isopropanol (10 vol%) in water | $\lambda > 420 \text{ nm}$  | 13100                                                                            | 2    |
| KDBT-A                                 | 0.17 g L <sup>-1</sup> | Methanol (10 vol%) in water    | Xe-lamp                     | 11286                                                                            | 43   |
| CNW03                                  | 0.1 g L <sup>-1</sup>  | Isopropanol (10%) in water     | $\lambda \geq 420\text{nm}$ | 15882                                                                            | 29   |
| PMCR-1                                 | 0.45 g L <sup>-1</sup> | Isopropanol (9 vol%) in water  | $\lambda \geq 400\text{nm}$ | 5500                                                                             | 44   |
| Pylm-COF                               | 0.2 g L <sup>-1</sup>  | Benzyl alcohol (10%) in water  | $\lambda > 420 \text{ nm}$  | 7600                                                                             | 45   |
| TpAP[5]                                | 0.08 g L <sup>-1</sup> | Ethanol (10 vol%) in water     | $\lambda \geq 420\text{nm}$ | 2343                                                                             | 46   |
| Fl-CN                                  | 0.5 g L <sup>-1</sup>  | Ethanol (10 vol %) in water    | $\lambda \geq 420\text{nm}$ | 1893                                                                             | 47   |
| P2ZIS                                  | 0.1 g L <sup>-1</sup>  | Isopropanol (10 vol%) in water | $\lambda \geq 420\text{nm}$ | 2107.7                                                                           | 48   |



## 2.14. Cyclic photocatalytic production of H<sub>2</sub>O<sub>2</sub> by Ni-CDs/COFs

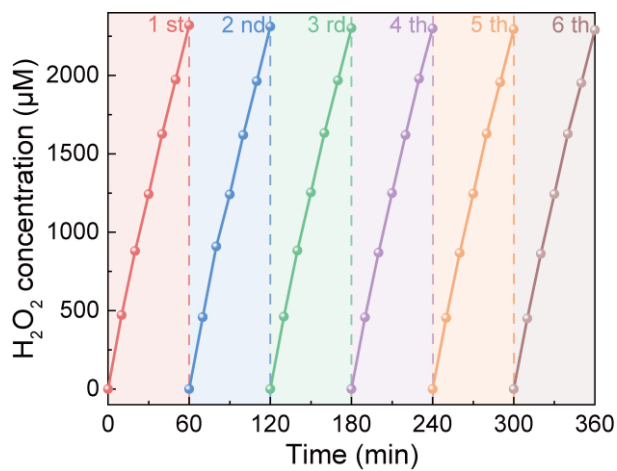

**Fig. S9** Cyclic photocatalytic production of H<sub>2</sub>O<sub>2</sub> by Ni-CDs/COFs in pure water.

## 2.15. SEM image of Ni-CDs/COFs after photocatalytic H<sub>2</sub>O<sub>2</sub> production

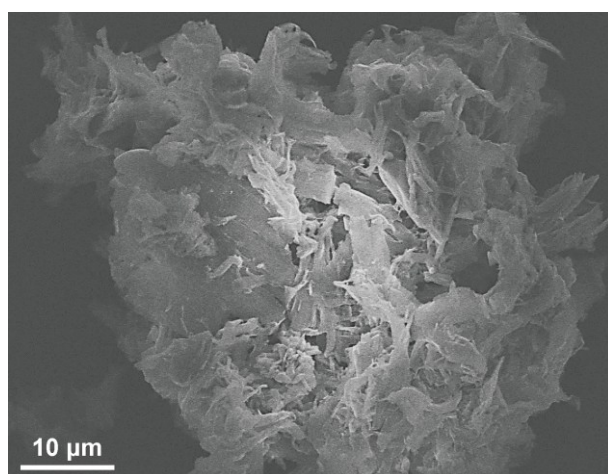

**Fig. S10** SEM image of Ni-CDs/COFs after photocatalytic H<sub>2</sub>O<sub>2</sub> production.

## 2.16. XRD pattern of Ni-CDs/COFs after photocatalytic H<sub>2</sub>O<sub>2</sub> production

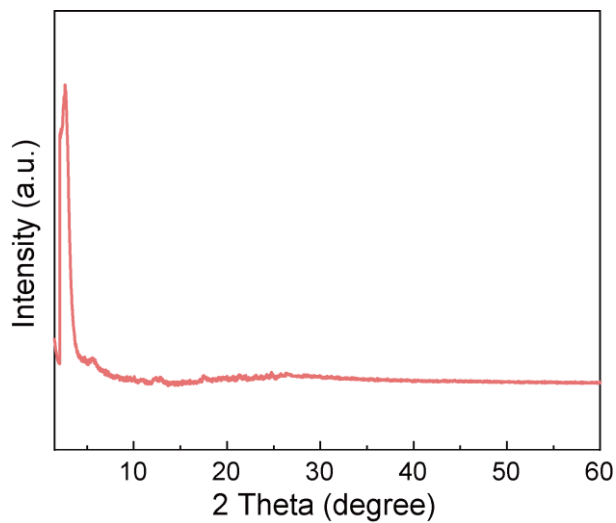

**Fig. S11** XRD pattern of Ni-CDs/COFs after photocatalytic H<sub>2</sub>O<sub>2</sub> production.

## 2.17. FT-IR spectrum of Ni-CDs/COFs after photocatalytic H<sub>2</sub>O<sub>2</sub> production

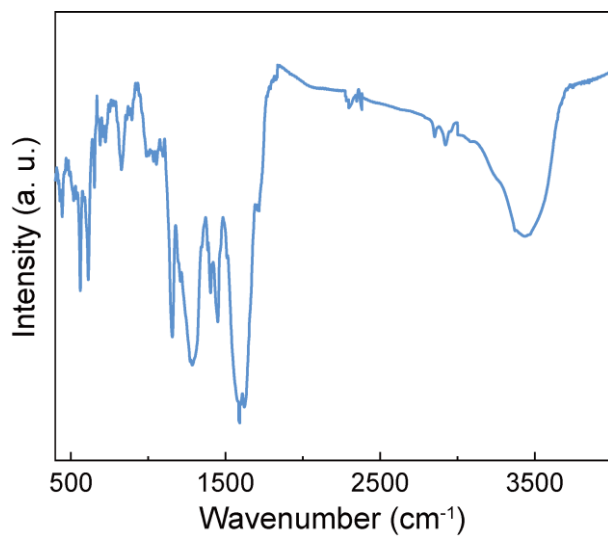

**Fig. S12** FT-IR spectrum of Ni-CDs/COFs after photocatalytic H<sub>2</sub>O<sub>2</sub> production.

## 2.18. Photocatalytic H<sub>2</sub>O<sub>2</sub> production by Ni-CDs/COFs after storage for 4 weeks

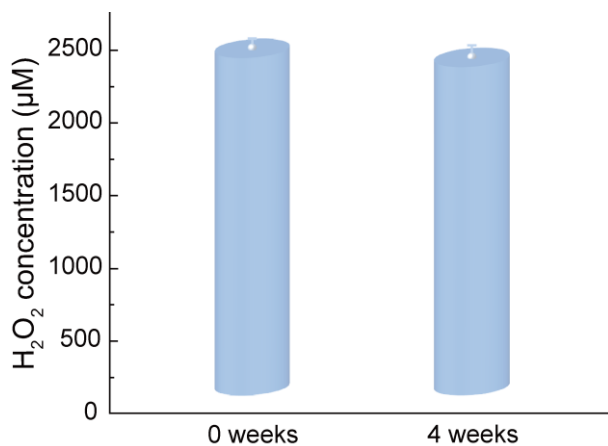

**Fig. S13** Photocatalytic H<sub>2</sub>O<sub>2</sub> production by Ni-CDs/COFs after storage for 4 weeks.

## 2.19. Photocatalytic H<sub>2</sub>O<sub>2</sub> decomposition under light irradiation

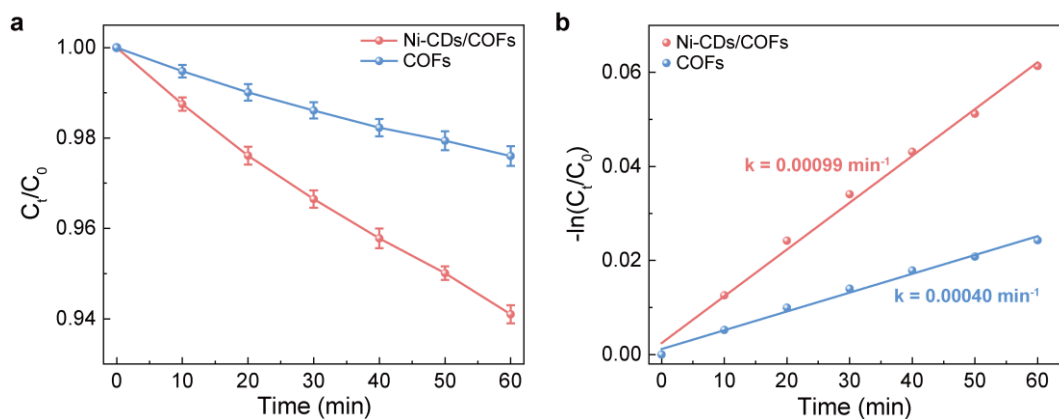

**Fig. S14** (a) Photocatalytic decomposition of H<sub>2</sub>O<sub>2</sub> under light irradiation. (b) Pseudo first order kinetic fitting curves of photocatalytic H<sub>2</sub>O<sub>2</sub> decomposition process.

## 2.20. Degradation of Orange II and cefalexin

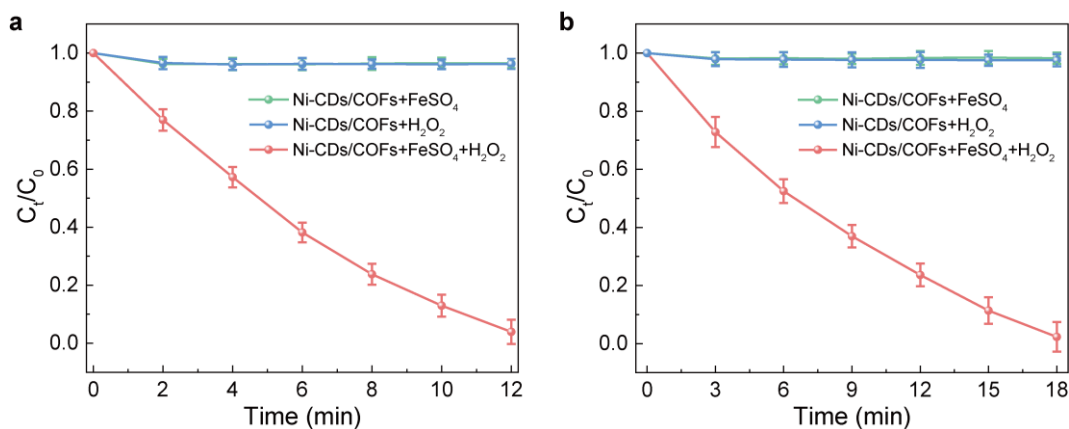

**Fig. S15** Degradation of (a) Orange II (25 mg L<sup>-1</sup>) and (b) cefalexin (10 mg L<sup>-1</sup>).

## 2.21. H<sub>2</sub>O<sub>2</sub> yield of various immobilized photocatalysts

**Table S6** H<sub>2</sub>O<sub>2</sub> yield of various immobilized photocatalysts.

| Photocatalyst | Solution   | Formed H <sub>2</sub> O <sub>2</sub> (μM cm <sup>-2</sup> h <sup>-1</sup> ) | Ref.      |
|---------------|------------|-----------------------------------------------------------------------------|-----------|
| Ni-CDs/COFs   | Pure water | 57.2                                                                        | This work |
| AmCOF         | Pure water | 4.8                                                                         | 49        |
| Furan-BILP    | Pure water | 11.4                                                                        | 50        |
| PI-BD-TPB     | Pure water | 0.1                                                                         | 15        |
| OF-N32        | Pure water | 43.75                                                                       | 4         |
| COF2-2CN      | Pure water | 0.044                                                                       | 51        |

## 2.22. UV-vis DRS spectrum of COFs

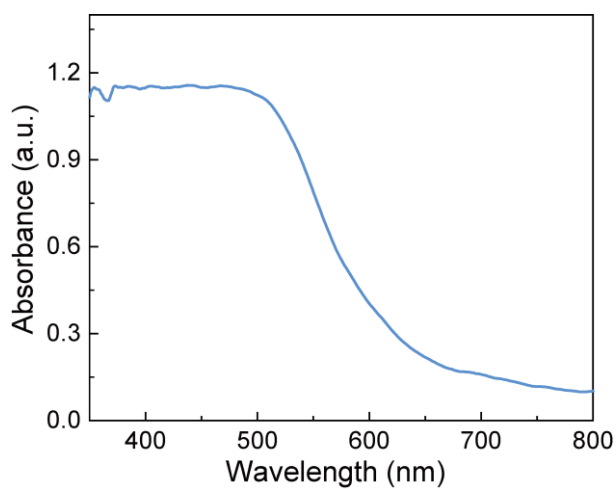

**Fig. S16** UV-vis DRS spectrum of COFs.

## 2.23. Mott-Schottky plots of COFs and Ni-CDs/COFs

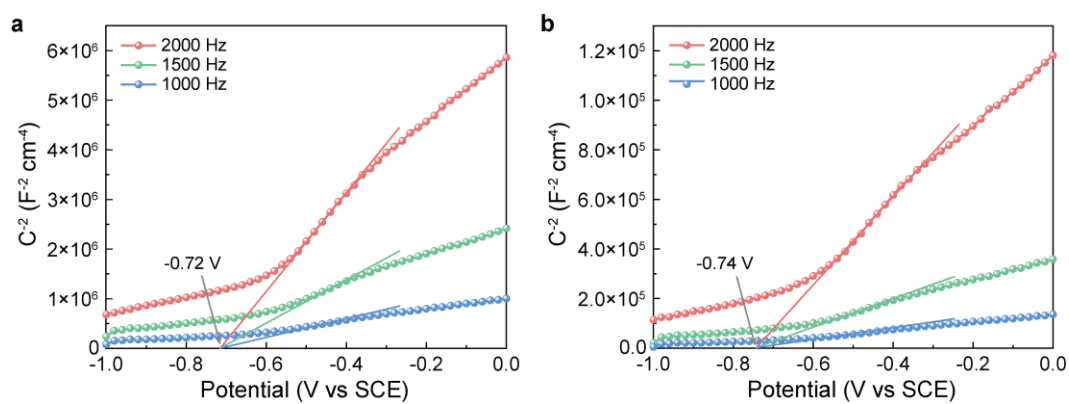

**Fig. S17** Mott-Schottky plots of (a) COFs and (b) Ni-CDs/COFs.

## 2.24. VB XPS spectra of COFs and Ni-CDs/COFs

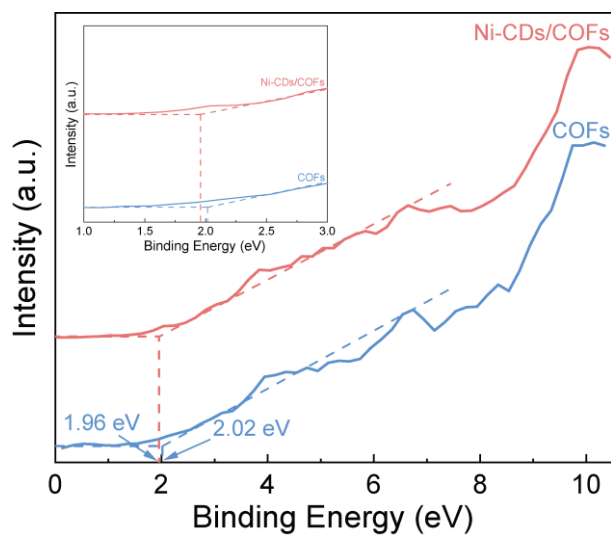

**Fig. S18** VB XPS spectra of COFs and Ni-CDs/COFs.

## 2.25. LUMO and HOMO of COFs

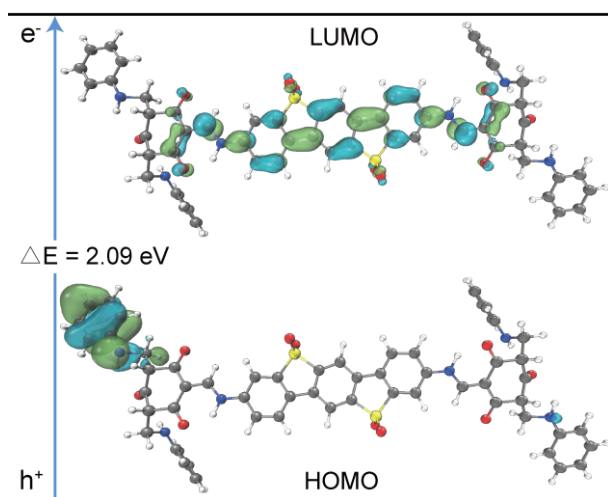

**Fig. S19** LUMO and HOMO of COFs.

## 2.26. SEM image, XRD pattern and FT-IR spectrum of CDs/COFs

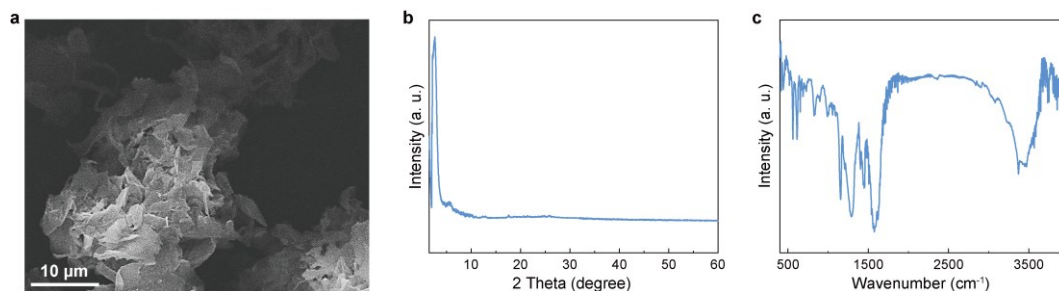

**Fig. S20** (a) SEM image, (b) XRD pattern and (c) FT-IR spectrum of CDs/COFs.

## 2.27. EIS spectra and Bode-phase plots of COFs, CDs/COFs and Ni-CDs/COFs

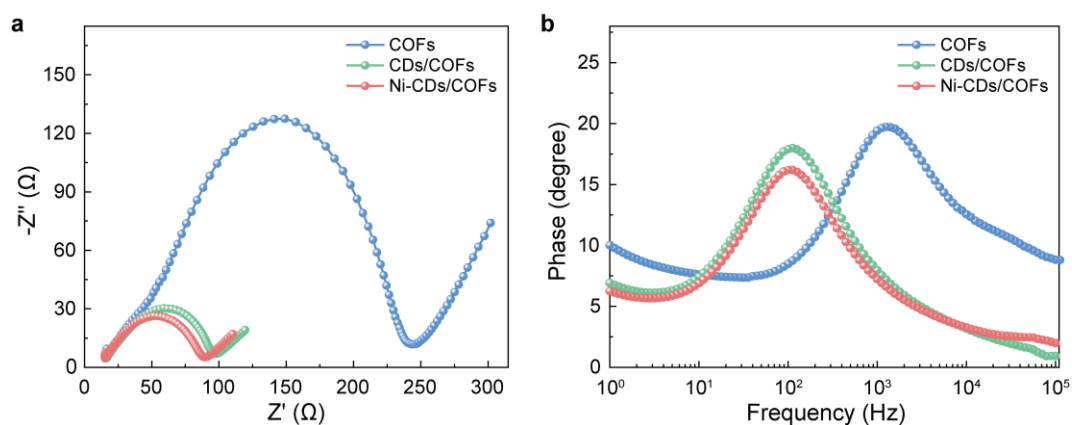

**Fig. S21** (a) EIS spectra and (b) Bode-phase plots of COFs, CDs/COFs and Ni-CDs/COFs.

## 2.28. Photocurrent of COFs, CDs/COFs and Ni-CDs/COFs

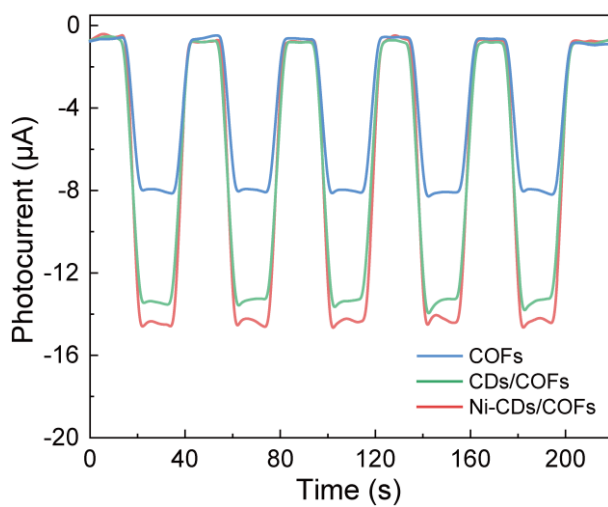

**Fig. S22** Photocurrent of COFs, CDs/COFs, and Ni-CDs/COFs.

## 2.29. fs-TA spectra of COFs, CDs/COFs and Ni-CDs/COFs probed at different time delays

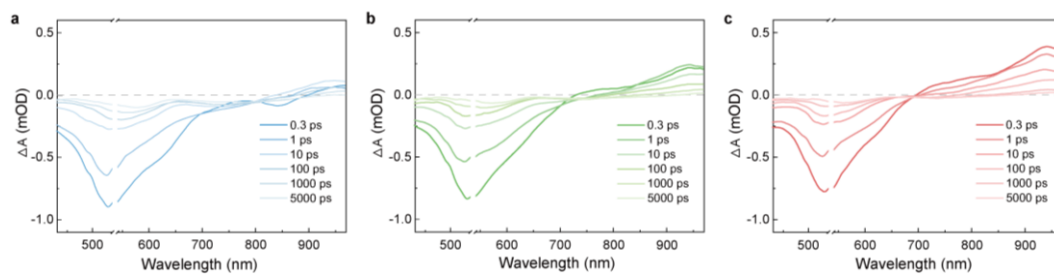

**Fig. S23** fs-TA spectra of (a) COFs, (b) CDs/COFs and (c) Ni-CDs/COFs probed at different time delays.



### 2.30. Normalized fs-TA decay dynamics of COFs, CDs/COFs and Ni-CDs/COFs probed at 530 nm

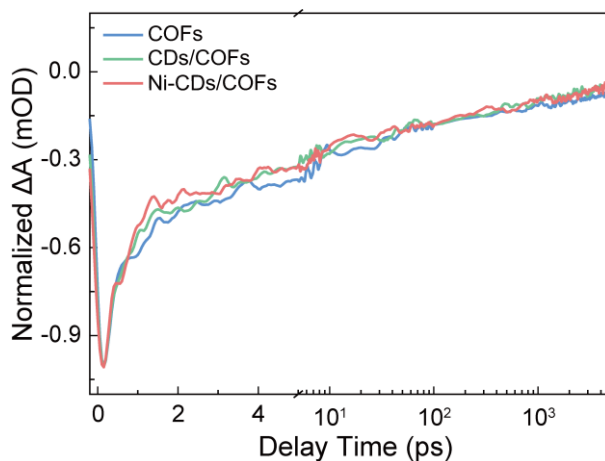

**Fig. S24** Normalized fs-TA decay dynamics of COFs, CDs/COFs and Ni-CDs/COFs probed at 530 nm.

### 2.31. Time-dependent photocatalytic H<sub>2</sub>O<sub>2</sub> production by CDs/COFs and CDs in pure water

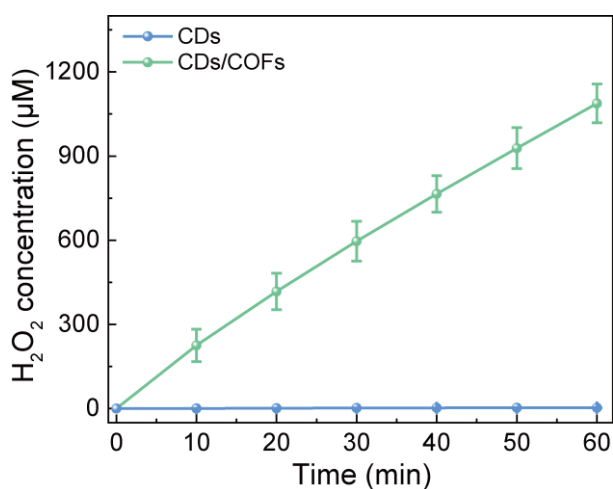

**Fig. S25** Time-dependent photocatalytic H<sub>2</sub>O<sub>2</sub> production by CDs/COFs and CDs in pure water.

### 2.32. Photocatalytic H<sub>2</sub>O<sub>2</sub> production by Ni-CDs/COFs with different scavengers

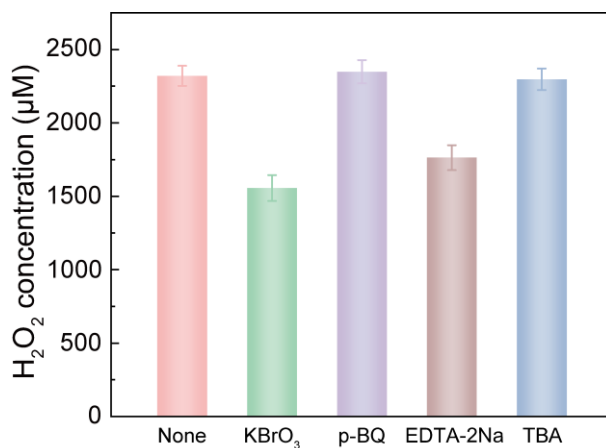

**Fig. S26** Photocatalytic H<sub>2</sub>O<sub>2</sub> production by Ni-CDs/COFs with different scavengers over one hour reaction.

### 2.33. LSV plots of COFs, CDs/COFs and Ni-CDs/COFs measured by RDE

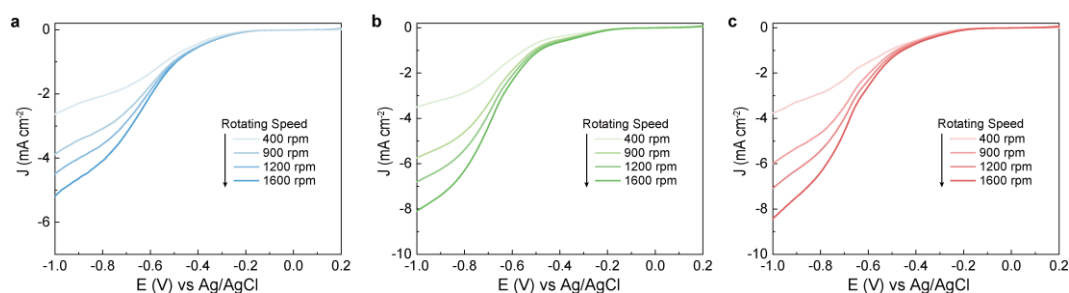

**Fig. S27** LSV plots of (a) COFs, (b) CDs/COFs and (c) Ni-CDs/COFs measured by RDE.

### 2.34. RRDE measurement for H<sub>2</sub>O<sub>2</sub> formation in ORR process

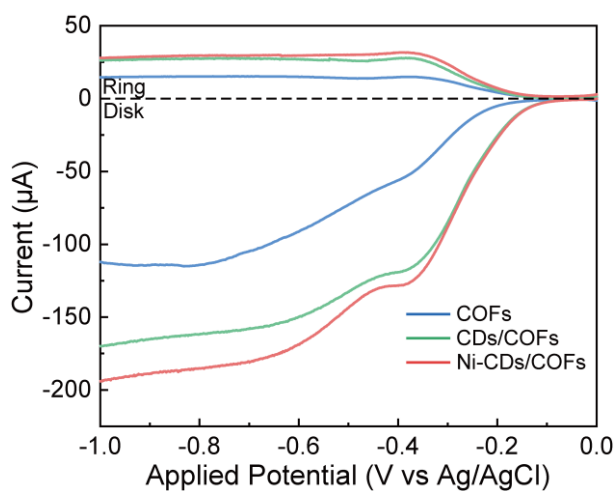

**Fig. S28** RRDE voltammograms obtained in 0.1 mol L<sup>-1</sup> phosphate buffer solution (disk electrode potential from -1 V vs Ag/AgCl to 0V vs Ag/AgCl, Pt ring electrode potential as 0.75 V vs Ag/AgCl to detect H<sub>2</sub>O<sub>2</sub>).

### 2.35. EPR spectra of $\cdot\text{O}_2^-$ , $^1\text{O}_2$ and $\cdot\text{OH}$ for Ni-CDs/COFs

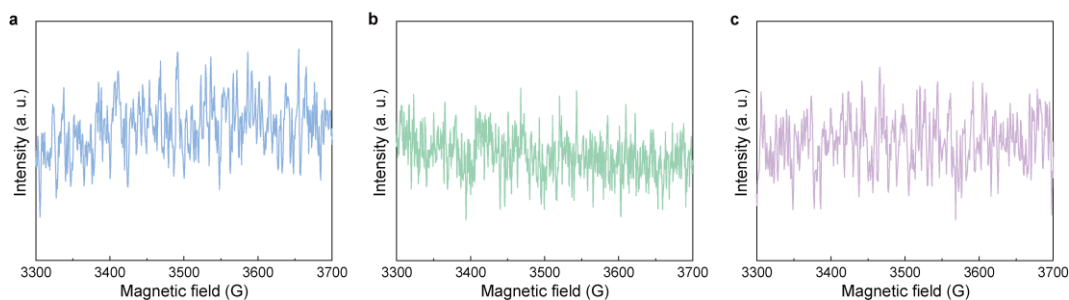

**Fig. S29** EPR spectra of (a)  $\cdot\text{O}_2^-$  (b)  $^1\text{O}_2$  and (c)  $\cdot\text{OH}$  for Ni-CDs/COFs.

2.36. Detection of  $\cdot\text{O}_2^-$  through NBT method

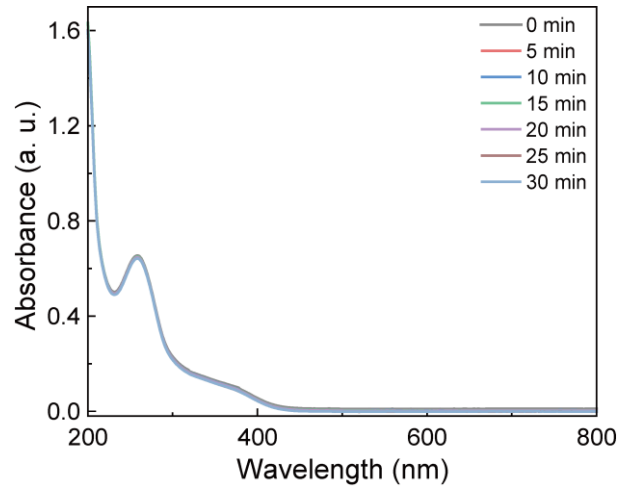

Fig. S30 Detection of  $\cdot\text{O}_2^-$  through NBT method.

2.37.  $\text{H}_2^{18}\text{O}$  isotope experiment to explore  $\text{H}_2\text{O}_2$  evolution through WOR process

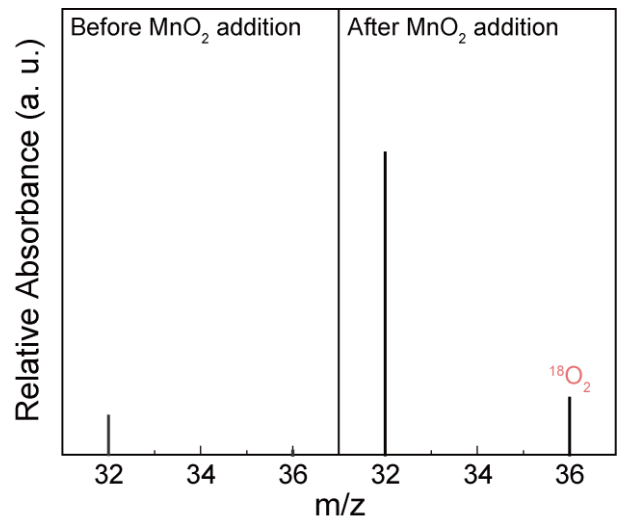

Fig. S31  $\text{H}_2^{18}\text{O}$  isotope experiment to explore  $\text{H}_2\text{O}_2$  evolution through WOR process

### 2.38. RRDE measurement for O<sub>2</sub> formation in WOR process

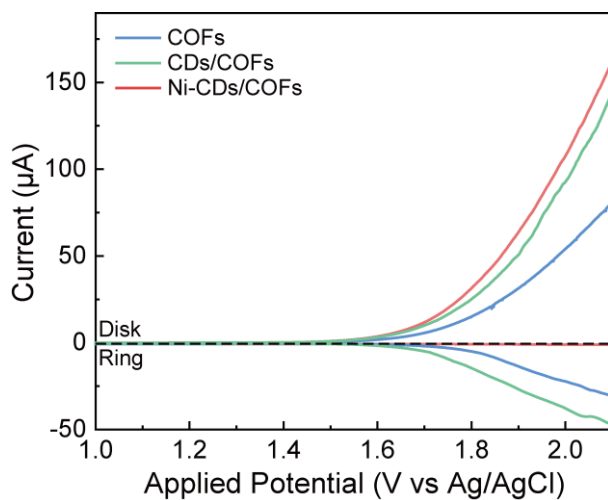

**Fig. S32** RRDE voltammograms obtained in phosphate buffer solution (0.1 mol L<sup>-1</sup>) (risk electrode potential from 1 V vs Ag/AgCl to 2.1 V vs Ag/AgCl, with Pt ring electrode potential as -0.25 V vs Ag/AgCl vs to detect O<sub>2</sub>).

### 2.39. In-situ Raman spectra of Co-CDs/COFs and Mn-CDs/COFs in photocatalytic water oxidation

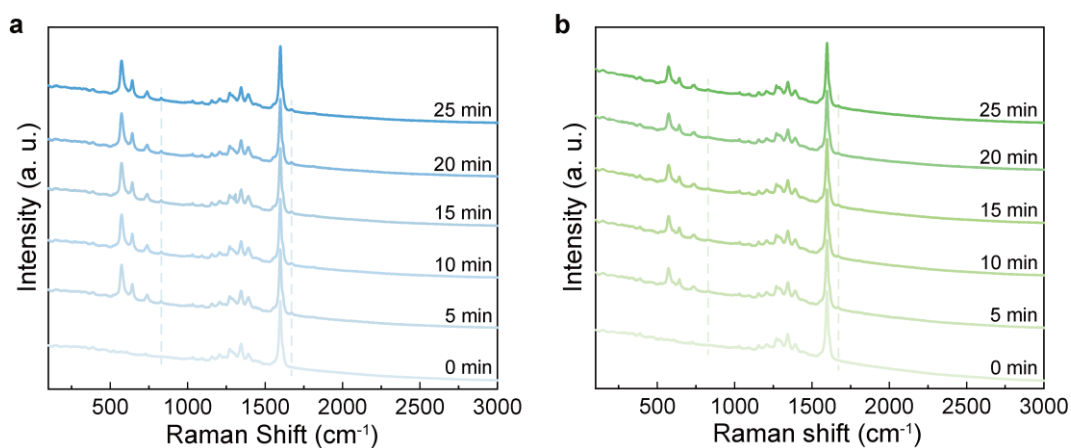

**Fig. S33** In-situ Raman spectra of (a) Co-CDs/COFs and (b) Mn-CDs/COFs recorded in aqueous solution saturated with Ar under visible-light irradiation.

## 2.40. Photocatalytic H<sub>2</sub>O<sub>2</sub> production by Co-CDs/COFs and Mn-CDs/COFs

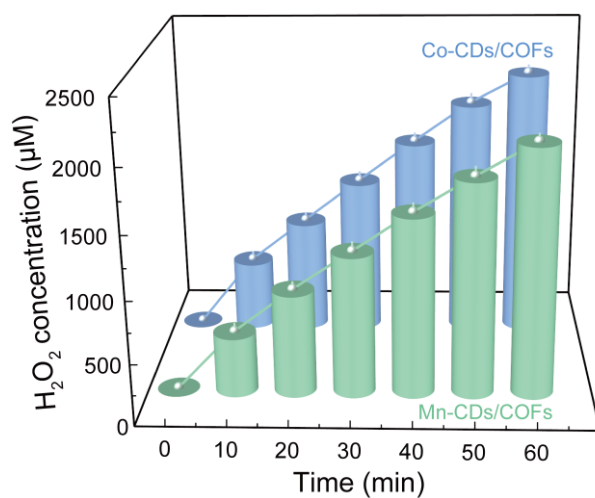

**Fig. S34** Photocatalytic H<sub>2</sub>O<sub>2</sub> production by Co-CDs/COFs and Mn-CDs/COFs (catalyst concentration as 0.2 g L<sup>-1</sup>, pure water filled with O<sub>2</sub>,  $\lambda \geq 420$  nm, reaction temperature as 25 °C).

## 2.41. Formation energy of O\* on carbon atom, O\* on nickel atom and OOH\* on carbon atom

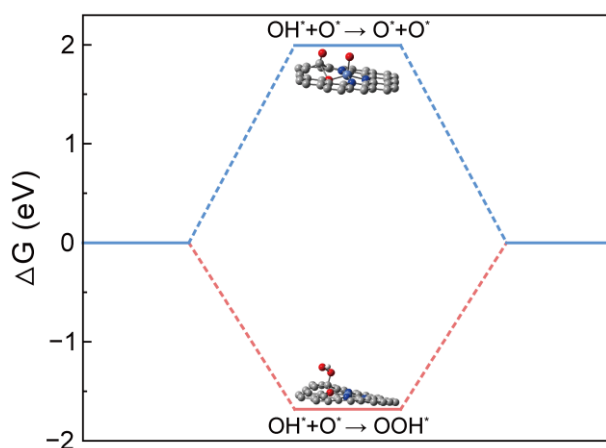

**Fig. S35** Formation energy of O\* on carbon atom, O\* on nickel atom and OOH\* on carbon atom.

## 2.42. Formation energy of $O_2$ and $H_2O_2$ from $OOH^*$

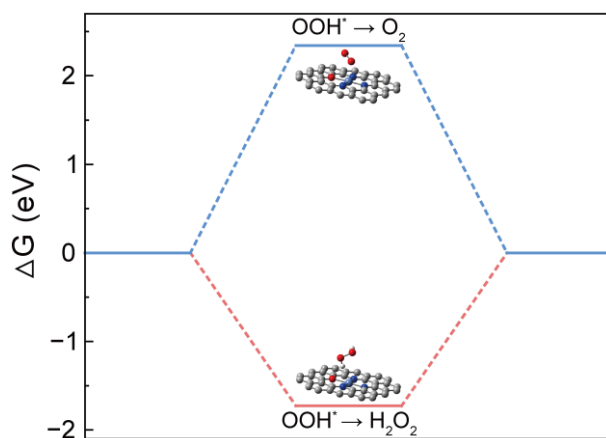

**Fig. S36** Formation energy of  $O_2$  and  $H_2O_2$  from  $OOH^*$ .

## 2.43. Formation energy of $OH^*$ on carbon atom, $O^*$ on nickel atom and $OH^*$ on nickel atom, $O^*$ on carbon atom

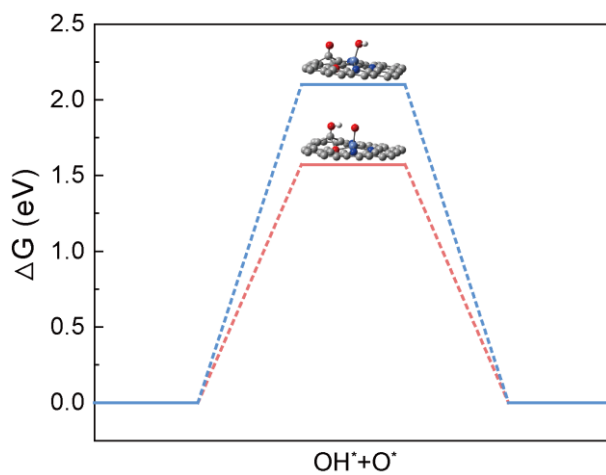

**Fig. S37** Formation energy of  $OH^*$  on carbon atom,  $O^*$  on nickel atom and  $OH^*$  on nickel atom,  $O^*$  on carbon atom, respectively.

## References

- 1 Y. Shiraishi, T. Takii, T. Hagi, S. Mori, Y. Kofuji, Y. Kitagawa, S. Tanaka, S. Ichikawa and T. Hirai, *Nat. Mater.*, 2019, **18**, 985-993.
- 2 L. Liu, F. Chen, J. Wu, J. Chen, H. Yu, *Proc. Natl. Acad. Sci. USA*, 2023, **120**, e2215305120.
- 3 Y. Zhang, C. Pan, G. Bian, J. Xu, Y. Dong, Y. Zhang, Y. Lou, W. Liu and Y. Zhu, *Nat. Energy*, 2023, **8**, 361-371.
- 4 F. Liu, P. Zhou, Y. Hou, H. Tan, Y. Liang, J. Liang, Q. Zhang, S. Guo, M. Tong and J. Ni, *Nat. Commun.*, 2023, **14**, 4344.
- 5 W. Ren, X. Tan, J. Qu, S. Li, J. Li, X. Liu, S. P. Ringer, J. M. Cairney, K. Wang, S. C. Smith, and C. Zhao, *Nat. Commun.* **2021**, *12*, 1449.
- 6 C. Wang, J. Zhang, K. Miao, M. Long, S. Lai, S. Zhao and X. Kang, *Adv. Mater.*, 2024, **36**, 2400433.
- 7 H. Xu, D. Cheng, D. Cao and X. Zeng, *Nat. Catal.*, 2024, **7**, 207-218.
- 8 H. Zhang, J. Gao, D. Raciti and A. Hall, *Nat. Catal.*, 2023, **6**, 807-817.
- 9 Z. Huang, S. Hu, M. Sun, Y. Xu, S. Liu, R. Ren, L. Zhuang, T. Chan, Z. Hu, T. Ding, J. Zhou, L. Liu, M. Wang, Y. Huang, N. Tian, L. Bu, L. Huang and X. Huang, *Nat. Commun.*, 2024, **15**, 1097.
- 10 L. Shang, Y. Ni, Y. Wang, W. Yang, L. Wang, H. Li, K. Zhang, Z. Yan and J. Chen, *Adv. Mater.*, 2024, **36**, 2413141.
- 11 T. Lu and F. Chen, *J. Comput. Chem.*, 2011, **33**, 580-592.
- 12 J. Zhang and T. Lu, *Phy. Chem. Chem. Phys.*, 2021, **23**, 20323-20328.
- 13 R. Wu, Q. Meng, J. Yan, Z. Zhang, B. Chen, H. Liu, J. Tai, G. Zhang, L. Zheng, J. Zhang and B. Han, *Nat. Catal.*, 2024, **7**, 702-718.
- 14 X. Zheng, J. Yang, P. Li, Q. Wang, J. Wu, E. Zhang, S. Chen, Z. Zhuang, W. Lai, S. Dou, W. Sun, D. Wang and Y. Li, *Sci. Adv.*, 2023, **9**, eadi8025.
- 15 W. Chi, Y. Dong, B. Liu, C. Pan, J. Zhang, H. Zhao, Y. Zhu and Z. Liu, *Nat. Commun.*, 2024, **15**, 5316.
- 16 X. Zhang, S. Cheng, C. Chen, X. Wen, J. Miao, B. Zhou, M. Long and L. Zhang, *Nat. Commun.*, 2024, **15**, 2649.



600 17 Z. Gong, Y. Gao, J. Li, Z. Cai, N. Liu and J. Jiang, *Angew. Chem. Int. Ed.*, 2025, **137**,  
601 e202423205.

602 18 C. He, J. Lei, X. Li, Z. Shen, L. Wang and J. Zhang, *Angew. Chem. Int. Ed.*, 2024, **63**,  
603 e202406143.

604 19 T. Yang, D. Zhang, A. Kong, Y. Zou, L. Yuan, C. Liu, S. Luo, G. Wei and C. Yu, *Angew.*  
605 *Chem. Int. Ed.*, 2024, **136**, e202404077.

606 20 R. Liu, Y. Chen, H. Yu, M. Polozij, Y. Guo, T. C. Sum, T. Heine and D. Jiang, *Nat. Catal.*  
607 2024, **7**, 195-206.

608 21 J. Ma, C. Peng, X. Peng, S. Liang, Z. Zhou, K. Wu, R. Chen, S. Liu, Y. Shen, H. Ma and Y.  
609 Zhang, *J. Am. Chem. Soc.*, 2024, **146**, 21147-21159.

610 22 Y. Luo, B. Zhang, C. Liu, D. Xia, X. Ou, Y. Cai, Y. Zhou, J. Jiang and B. Han, *Angew.*  
611 *Chem. Int. Ed.*, 2023, **62**, e202305355.

612 23 Y. Liu, L. Li, Z. Sang, H. Tan, N. Ye, C. Sun, Z. Sun, M. Luo and S. Guo, *Nat. Synth.*, 2024,  
613 **3**, 134-141.

614 24 H. Yan, Y. Peng, Y. Huang, M. Shen, X. Wei, W. Zou, Q. Tong, N. Zhou, J. Xu, Y. Zhang,  
615 Y. Ye and G. Ouyang, *Adv. Mater.*, 2024, **36**, 2311535.

616 25 J. Qiu, K. Meng, Y. Zhang, B. Cheng, J. Zhang, L. Wang and J. Yu, *Adv. Mater.*, 2024, **36**,  
617 2400288.

618 26 J. Chang, Q. Li, J. Shi, M. Zhang, L. Zhang, S. Li, Y. Chen, S. Li and Y. Lan, *Angew. Chem.*  
619 *Int. Ed.*, 2023, **135**, e202218868.

620 27 Y. Chen, R. Liu, Y. Guo, G. Wu, T. C. Sum, S. Yang and D. Jiang, *Nat. Synth.*, 2024, **3**,  
621 998-1010.

622 28 L. Zhang, C. Wang, Q. Jiang, P. Lyu and Y. Xu, *J. Am. Chem. Soc.*, 2024, **146**, 29943-  
623 29954.

624 29 C. Feng, J. Luo, C. Chen, S. Zuo, Y. Ren, Z. Wu, M. Hu, S. Ould-Chikh, J. Ruiz-Martínez,  
625 Y. Han, and H. Zhang, *Energy Environ. Sci.*, 2024, **17**, 1520-1530.

626 30 X. Zhang, H. Su, P. Cui, Y. Cao, Z. Teng, Q. Zhang, Y. Wang, Y. Feng, R. Feng, J. Hou,  
627 X. Zhou, P. Ma, H. Hu, K. Wang, C. Wang, L. Gan, Y. Zhao, Q. Liu, T. Zhang and K.  
628 Zheng, *Nat. Commun.*, 2023, **14**, 7115.

629 31 X. Chi, Z. Zhang, M. Li, Y. Jiao, X. Li, F. Meng, B. Xue, D. Wu and F. Zhang, *Angew.*  
630 *Chem. Int. Ed.*, 2025, **137**, e202418895.

631 32 H. Peng, H. Yang, J. Han, X. Liu, D. Su, T. Yang, S. Liu, C. Pao, Z. Hu, Q. Zhang, Y. Xu,  
632 H. Geng and X. Huang, *J. Am. Chem. Soc.*, 2023, **145**, 27757-27766.

633 33 H. He, Z. Wang, J. Zhang, S. Mamatkulov, O. Ruzimuradov, K. Dai, J. Low and Y. Li,  
634 *Energy Environ. Sci.*, 2025, **18**, 6191-6201.

635 34 Y. Deng, W. Liu, R. Xu, R. Gao, N. Huang, Y. Zheng, Y. Huang, H. Li, X. Kong and L. Ye,  
636 *Angew. Chem. Int. Ed.*, 2024, **63**, e202319216.

637 35 P. Das, G. Chakraborty, J. Roeser, S. Vogl, J. Rabeah and A. Thomas, *J. Am. Chem. Soc.*,  
638 2023, **145**, 2975-2984.

639 36 H. Xu, Y. Wang, Y. Xu, Q. Wang, M. Zhuang, Q. Liao and K. Xi, *Angew. Chem. Int. Ed.*,  
640 2024, **136**, e202408802.

641 37 P. Liu, T. Liang, Y. Li, Z. Zhang, Z. Li, J. Bian and L. Jing, *Nat. Commun.*, 2024, **15**, 9224.

642 38 C. Bai, L. Liu, J. Chen, F. Chen, Z. Zhang, Y. Sun, X. Chen, Q. Yang and H. Yu, *Nat.*  
643 *Commun.*, 2024, **15**, 4718.

644 39 X. Zhang, D. Gao, B. Zhu, B. Cheng, J. Yu and H. Yu, *Nat. Commun.*, 2024, **15**, 3212.

645 40 L. Cao, C. Wang, H. Wang, X. Xu, X. Tao, H. Tan and G. Zhu, *Angew. Chem. Int. Ed.*,  
646 2024, **136**, e202402095.

647 41 Y. Tang, X. Luo, R. Xia, J. Luo, S. Peng, Z. Liu, Q. Gao, M. Xie, R. Wei, G. Ning and D.  
648 Li, *Angew. Chem. Int. Ed.*, 2024, **63**, e202408186.

649 42 J. Wang, K. Song, T. Luan, K. Cheng, Q. Wang, Y. Wang, W. Yu, P. Li and Y. Zhao, *Nat.*  
650 *Commun.*, 2024, **15**, 1267.

651 43 C. Cheng, J. Yu, D. Xu, L. Wang, G. Liang, L. Zhang and M. Jaroniec, *Nat. Commun.*, 2024,  
652 **15**, 1313.

653 44 P. Das, J. Roeser and A. Thomas, *Angew. Chem. Int. Ed.*, 2023, **135**, e202304349.

654 45 W. Wu, Z. Li, S. Liu, D. Zhang, B. Cai, Y. Liang, M. Wu, Y. Liao and X. Zhao, *Angew.*  
655 *Chem. Int. Ed.*, 2024, **63**, e202404563.

656 46 Z. Wang, M. Li, S. Liang, Y. Kong, C. Wang, L. Li, J. Xu and Y. Yang, *J. Am. Chem. Soc.*,  
657 2025, **147**, 13618-13628.

658 47 B. Feng, Y. Liu, K. Wan, S. Zu, Y. Bei, X. Zhang, M. Qiao, H. Li and B. Zong, *Angew.*  
659 *Chem. Int. Ed.*, 2024, **136**, e202401884.  
660 48 K. Zhang, L. Tian, J. Yang, F. Wu, L. Wang, H. Tang and Z. Liu, *Angew. Chem. Int. Ed.*,  
661 2023, **63**, e202317816.  
662 49 L. Fang, H. Xu, S. Qiu, T. Ye, T. Wang, J. Shang, C. Gu, S. Kitagawa and L. Li, *Angew.*  
663 *Chem. Int. Ed.*, 2025, **64**, e202423220.  
664 50 T. Yang, Y. Jin, Y. Wang, A. Kong, Y. Chen, Y. Zou, C. Liu, G. Wei and C. Yu, *Adv. Funct.*  
665 *Mater.*, 2023, **33**, 2300714.  
666 51 Y. Hou, P. Zhou, F. Liu, Y. Lu, H. Tan, Z. Li, M. Tong and J. Ni, *Angew. Chem. Int. Ed.*,  
667 2024, **136**, e202318562.
